# Supplementary material for: The Role of miR-217-5p in the Puromycin Aminonucleoside-Induced Morphological Change of Podocytes
Source: Noncoding RNA. 2022 Jun 8;8(3):43. doi: 10.3390/ncrna8030043 (PMC9229466; doi:10.3390/ncrna8030043)
Supplement: Supplementary file 1 [file ncrna-08-00043-s001.zip]

Archive with 8 entries (8 files):
- SupplFigure_revise_ver6.pdf
- Table S1_MinRevise.pdf
- Table_S2_MinRevise.pdf
- Table_S3_MinRevise.xlsx
- Table_S4_MinRevise.xlsx
- Table_S5_MinRevise.pdf
- Table_S6_MinRevise.xlsx
- Table_S7_MinRevise.xlsx
