# Supplementary material for: The Role of miR-217-5p in the Puromycin Aminonucleoside-Induced Morphological Change of Podocytes
Source: Noncoding RNA. 2022 Jun 8;8(3):43. doi: 10.3390/ncrna8030043 (PMC9229466; doi:10.3390/ncrna8030043)
Supplement: Supplementary file 1 [file ncrna-08-00043-s001.zip › Table_S3_MinRevise.xlsx]

## Sheet: FPKM>10, FC>1.2
test_id	gene_id	gene	locus	Cont_value	PAN_value	log2(fold_change)	fold_change	test_stat	p_value	q_value	significant
XLOC_021426	XLOC_021426	Il1rl1	chr9:47134033-47184642	5.097	19.3493	1.92456	3.79621	6.84979	5e-05	0.00128863	yes
XLOC_014088	XLOC_014088	Fjx1	chr3:92288817-92290919	2.90455	10.8904	1.90667	3.74943	6.09805	5e-05	0.00128863	yes
XLOC_016899	XLOC_016899	Klf4	chr5:72283188-72287669	10.9983	31.2453	1.50635	2.8409	6.0462	5e-05	0.00128863	yes
XLOC_000044	XLOC_000044	Arg1	chr1:21525296-21537870	3.88145	10.6309	1.4536	2.73891	4.09744	5e-05	0.00128863	yes
XLOC_017125	XLOC_017125	Gjb3	chr5:145390590-145396838	5.55649	13.0355	1.2302	2.346	3.93368	5e-05	0.00128863	yes
XLOC_008772	XLOC_008772	Dusp4	chr16:61078181-61092808	5.00136	10.5918	1.08255	2.11778	4.19795	5e-05	0.00128863	yes
XLOC_018425	XLOC_018425	-	chr6:51661006-51666589	6.93765	14.6811	1.08144	2.11615	4.71424	5e-05	0.00128863	yes
XLOC_002359	XLOC_002359	Ccnd1	chr1:218090749-218100336	28.8892	59.7653	1.04878	2.06878	4.65425	5e-05	0.00128863	yes
XLOC_008072	XLOC_008072	Tgm1	chr15:34378134-34391876	6.59199	13.1762	0.99915	1.99882	3.6637	5e-05	0.00128863	yes
XLOC_021373	XLOC_021373	LOC688459	chr9:23420653-23424832	10.1686	19.8109	0.962175	1.94824	3.77823	5e-05	0.00128863	yes
XLOC_012312	XLOC_012312	Hmga1	chr20:7133104-7142275	59.0674	113.609	0.943641	1.92338	4.05302	5e-05	0.00128863	yes
XLOC_000314	XLOC_000314	Plaur	chr1:81328115-81345271	21.454	41.0049	0.934553	1.9113	3.63849	5e-05	0.00128863	yes
XLOC_005357	XLOC_005357	Fam43a	chr11:73676511-73679677	7.21273	13.6694	0.922333	1.89518	3.42147	5e-05	0.00128863	yes
XLOC_017285	XLOC_017285	Pik3cd	chr5:166602049-166650121	9.58943	17.951	0.904547	1.87196	3.85121	5e-05	0.00128863	yes
XLOC_012941	XLOC_012941	LOC499781	chr3:11811621-11820748	37.562	70.1892	0.901976	1.86862	3.00489	0.0004	0.00766099	yes
XLOC_011001	XLOC_011001	Crabp2	chr2:187322341-187326788	37.3012	69.3012	0.893659	1.85788	3.40327	5e-05	0.00128863	yes
XLOC_009895	XLOC_009895	Cd14	chr18:29560363-29561959	7.25098	13.4182	0.887947	1.85054	3.29213	5e-05	0.00128863	yes
XLOC_015325	XLOC_015325	Gprc5a	chr4:168832936-168851650	36.304	65.9902	0.862124	1.81771	4.13888	5e-05	0.00128863	yes
XLOC_018269	XLOC_018269	Alkbh1	chr6:111456298-111507782	9.36941	16.8503	0.846747	1.79844	2.12466	0.0002	0.00422515	yes
XLOC_013028	XLOC_013028	Dhrs9	chr3:55623174-55650626	6.62464	11.828	0.836292	1.78546	2.34346	5e-05	0.00128863	yes
XLOC_001338	XLOC_001338	Raet1l	chr1:1101686-1671139	14.3549	25.0304	0.802137	1.74368	2.17867	0.00015	0.00330926	yes
XLOC_022440	XLOC_022440	Mum1l1	chrX:110375452-110411217	6.12123	10.6248	0.795535	1.73572	3.17207	5e-05	0.00128863	yes
XLOC_008077	XLOC_008077	Ripk3	chr15:34470787-34479741	20.5102	35.3578	0.785688	1.72391	3.28085	5e-05	0.00128863	yes
XLOC_005407	XLOC_005407	Arvcf	chr11:86667994-86793791	11.763	20.1894	0.779347	1.71635	2.13425	0.00015	0.00330926	yes
XLOC_012440	XLOC_012440	Marcks	chr20:42966139-42971838	24.3356	41.6878	0.776556	1.71304	3.54857	5e-05	0.00128863	yes
XLOC_012308	XLOC_012308	Cdkn1a	chr20:6348421-6359074	112.403	191.291	0.767092	1.70184	3.31854	5e-05	0.00128863	yes
XLOC_004299	XLOC_004299	Traf4	chr10:65418697-65424816	25.5448	43.4186	0.76528	1.6997	3.25877	5e-05	0.00128863	yes
XLOC_002350	XLOC_002350	-	chr1:216845559-216858722	10.1275	17.1939	0.763626	1.69775	2.58325	5e-05	0.00128863	yes
XLOC_015555	XLOC_015555	Fam131b	chr4:71703871-71713126	17.2717	28.8375	0.739539	1.66964	3.22918	5e-05	0.00128863	yes
XLOC_000550	XLOC_000550	Aen	chr1:140584348-140594863	30.3168	50.1132	0.725071	1.65298	3.15378	5e-05	0.00128863	yes
XLOC_003551	XLOC_003551	Slfn2	chr10:70370014-70394601	41.3564	68.3301	0.724411	1.65223	1.76628	0.0021	0.0285105	yes
XLOC_019014	XLOC_019014	Dnajc22	chr7:140781850-140786936	8.95621	14.7532	0.720067	1.64726	2.12408	0.00055	0.00976898	yes
XLOC_022317	XLOC_022317	Sat1	chrX:43626479-43629767	77.1467	125.84	0.705916	1.63118	3.64001	5e-05	0.00128863	yes
XLOC_000351	XLOC_000351	Sertad1	chr1:84293101-84296369	46.6729	76.1156	0.705606	1.63083	3.54094	5e-05	0.00128863	yes
XLOC_007447	XLOC_007447	Slc35e4	chr14:84141963-84170835	8.96215	14.5433	0.698439	1.62275	1.90141	0.0008	0.0132475	yes
XLOC_010948	XLOC_010948	Rap2b	chr2:151685250-151685802	14.8003	24.0132	0.698205	1.62248	2.77101	0.00145	0.0212814	yes
XLOC_005740	XLOC_005740	Sh2b3	chr12:40243256-40338810	9.96098	16.1308	0.695462	1.6194	2.44829	0.0001	0.00233161	yes
XLOC_004492	XLOC_004492	Etv4	chr10:89685014-89700283	11.3597	18.3354	0.690707	1.61407	2.71964	5e-05	0.00128863	yes
XLOC_002019	XLOC_002019	Folr1	chr1:166933612-166944391	7.07193	11.3778	0.686048	1.60887	1.7327	0.0033	0.0405749	yes
XLOC_022410	XLOC_022410	Cstf2	chrX:104882746-104932508	31.8109	51.0231	0.681627	1.60395	2.57825	0.0001	0.00233161	yes
XLOC_004181	XLOC_004181	Tmem88	chr10:55997613-56000273	24.8492	39.8546	0.681547	1.60386	2.20505	0.0001	0.00233161	yes
XLOC_009806	XLOC_009806	Pard6g	chr18:76559692-76629893	8.67136	13.8844	0.679131	1.60118	2.40939	5e-05	0.00128863	yes
XLOC_016509	XLOC_016509	Rps14	chr5:144067410-144099856	30.4613	48.6647	0.6759	1.59759	1.76815	0.00385	0.0451097	yes
XLOC_003930	XLOC_003930	Amdhd2	chr10:13528412-13536899	24.1812	38.5966	0.674588	1.59614	3.13485	5e-05	0.00128863	yes
XLOC_018968	XLOC_018968	Gtse1	chr7:126736386-126753220	16.6318	26.4968	0.671871	1.59314	2.83404	5e-05	0.00128863	yes
XLOC_013451	XLOC_013451	Id1	chr3:148215587-148216715	21.4373	34.0126	0.66595	1.58661	3.00329	0.0001	0.00233161	yes
XLOC_019553	XLOC_019553	Pmm1	chr7:123183503-123193761	95.7768	150.736	0.654272	1.57382	3.37153	5e-05	0.00128863	yes
XLOC_002420	XLOC_002420	Frmd8	chr1:221213195-221233953	51.304	80.6809	0.653157	1.57261	2.89496	5e-05	0.00128863	yes
XLOC_017115	XLOC_017115	Adprhl2	chr5:144336310-144341586	24.6358	38.693	0.651317	1.5706	2.71143	5e-05	0.00128863	yes
XLOC_013212	XLOC_013212	Pamr1	chr3:92403544-92502094	10.0405	15.616	0.637192	1.5553	2.55215	0.0001	0.00233161	yes
XLOC_004507	XLOC_004507	-	chr10:90383543-90393466	12.4045	19.1558	0.626917	1.54426	2.58338	5e-05	0.00128863	yes
XLOC_004014	XLOC_004014	Ccng1	chr10:25903924-25910298	372.697	572.556	0.619412	1.53625	2.38391	5e-05	0.00128863	yes
XLOC_018836	XLOC_018836	Trib1	chr7:99954217-99964177	23.4654	35.9671	0.616145	1.53277	2.46829	5e-05	0.00128863	yes
XLOC_006291	XLOC_006291	Phlda3	chr13:52588916-52592002	104.488	159.462	0.609867	1.52612	3.07779	5e-05	0.00128863	yes
XLOC_009581	XLOC_009581	-	chr17:86407830-86410995	7.70176	11.7463	0.608947	1.52515	2.52827	0.0001	0.00233161	yes
XLOC_009939	XLOC_009939	Lox	chr18:47500309-47607512	102.812	156.162	0.603041	1.51891	2.51662	5e-05	0.00128863	yes
XLOC_014848	XLOC_014848	Cav1	chr4:44597122-44630209	46.6302	70.7221	0.600897	1.51666	2.67701	5e-05	0.00128863	yes
XLOC_015327	XLOC_015327	Emp1	chr4:169161547-169181967	77.0594	116.861	0.600744	1.5165	2.66275	5e-05	0.00128863	yes
XLOC_009176	XLOC_009176	Net1	chr17:69991795-70020975	8.7744	13.3021	0.600281	1.51601	2.38041	0.0001	0.00233161	yes
XLOC_011463	XLOC_011463	Chmp4c	chr2:93574555-93641497	10.9979	16.6701	0.600031	1.51575	2.44988	0.00025	0.00516407	yes
XLOC_002384	XLOC_002384	Lrfn4	chr1:219759182-219860232	16.2792	24.637	0.597794	1.5134	2.38141	0.00015	0.00330926	yes
XLOC_018911	XLOC_018911	Maff	chr7:120580742-120592095	12.3799	18.7267	0.597099	1.51267	2.32349	5e-05	0.00128863	yes
XLOC_016842	XLOC_016842	Fam214b	chr5:58477172-58490794	21.2799	32.1414	0.594941	1.51041	2.10818	0.00025	0.00516407	yes
XLOC_006385	XLOC_006385	Aldh9a1	chr13:85580784-85597503	55.0317	83.0995	0.594577	1.51003	2.6542	5e-05	0.00128863	yes
XLOC_012643	XLOC_012643	Slc19a1	chr20:12334667-12352789	9.5463	14.3821	0.59126	1.50656	2.26752	5e-05	0.00128863	yes
XLOC_006381	XLOC_006381	-	chr13:84474226-84536236	8.42176	12.6875	0.59121	1.50651	2.47394	0.0001	0.00233161	yes
XLOC_013584	XLOC_013584	Pard6b	chr3:164821993-164843395	17.8316	26.8612	0.591093	1.50639	2.54315	5e-05	0.00128863	yes
XLOC_005955	XLOC_005955	Hspb1	chr12:23839389-23841051	332.315	499.577	0.588155	1.50332	3.20122	5e-05	0.00128863	yes
XLOC_002159	XLOC_002159	Dkk3	chr1:176940692-176983045	6.71896	10.092	0.586905	1.50202	2.40456	5e-05	0.00128863	yes
XLOC_001825	XLOC_001825	Ppp1r15a	chr1:101511898-101517284	13.2947	19.9532	0.58577	1.50084	2.33739	5e-05	0.00128863	yes
XLOC_011028	XLOC_011028	Shc1	chr2:188745502-188757066	41.2048	61.7826	0.584388	1.4994	2.57888	5e-05	0.00128863	yes
XLOC_007912	XLOC_007912	Lmo7	chr15:86243147-86458513	21.0506	31.5511	0.583828	1.49882	2.42224	5e-05	0.00128863	yes
XLOC_001238	XLOC_001238	Ubtd1	chr1:261229346-261280547	19.7577	29.4297	0.574854	1.48953	2.18831	0.0003	0.00606217	yes
XLOC_018609	XLOC_018609	Mknk2	chr7:11908106-11919247	29.6888	44.1784	0.573425	1.48805	2.56322	5e-05	0.00128863	yes
XLOC_009285	XLOC_009285	S1pr3	chr17:13799224-13812816	8.22833	12.2319	0.571974	1.48656	2.30892	5e-05	0.00128863	yes
XLOC_015798	XLOC_015798	Bid	chr4:153442108-153465442	9.2308	13.6934	0.568951	1.48344	1.90345	0.00115	0.0176786	yes
XLOC_021940	XLOC_021940	Hes6	chr9:98549695-98551426	33.8165	50.1522	0.568587	1.48307	2.3606	0.0001	0.00233161	yes
XLOC_018134	XLOC_018134	Ahr	chr6:54963989-55001864	24.1438	35.7651	0.566899	1.48134	2.50865	5e-05	0.00128863	yes
XLOC_003945	XLOC_003945	Gfer	chr10:14059346-14061703	13.3814	19.7904	0.564569	1.47895	2.00794	0.00045	0.00844462	yes
XLOC_022707	XLOC_022707	-	chrX:71956235-71961170	16.4443	24.3152	0.564275	1.47864	2.4712	5e-05	0.00128863	yes
XLOC_005884	XLOC_005884	Fscn1	chr12:13655458-13668595	25.8624	38.2199	0.56347	1.47782	2.57625	5e-05	0.00128863	yes
XLOC_021932	XLOC_021932	Arl4c	chr9:95783650-95787092	23.8914	35.2879	0.562682	1.47701	2.6124	5e-05	0.00128863	yes
XLOC_009404	XLOC_009404	Inhba	chr17:51894686-51914495	38.6722	56.9721	0.558959	1.47321	1.5908	0.00365	0.0433861	yes
XLOC_018897	XLOC_018897	Cdc42ep1	chr7:120063112-120077612	12.9793	19.0866	0.556346	1.47054	2.33631	0.00015	0.00330926	yes
XLOC_021351	XLOC_021351	-	chr9:17687621-17725420	20.203	29.6905	0.555432	1.46961	2.12516	0.00025	0.00516407	yes
XLOC_011542	XLOC_011542	Tm4sf1	chr2:147378225-147392062	64.2646	94.4085	0.554893	1.46906	1.90816	0.0009	0.0145072	yes
XLOC_017642	XLOC_017642	-	chr6:33517722-33548082	7.74775	11.3796	0.554604	1.46877	2.17011	0.0002	0.00422515	yes
XLOC_010365	XLOC_010365	Cmtm3	chr19:784617-838350	32.0655	46.9394	0.549776	1.46386	1.68324	0.0037	0.0439056	yes
XLOC_018726	XLOC_018726	Dusp6	chr7:41475162-41479393	94.156	137.771	0.549151	1.46322	2.57451	5e-05	0.00128863	yes
XLOC_021983	XLOC_021983	Tgif1	chr9:119181080-119190698	36.545	53.4723	0.549119	1.46319	2.30721	5e-05	0.00128863	yes
XLOC_003205	XLOC_003205	Mgat1	chr10:34518408-34537253	57.5121	84.0997	0.548235	1.4623	2.38665	5e-05	0.00128863	yes
XLOC_012225	XLOC_012225	Atat1	chr20:3351287-3364559	7.73251	11.3069	0.548201	1.46226	1.67739	0.00415	0.0475069	yes
XLOC_010475	XLOC_010475	Fhod1	chr19:37284924-37303788	8.63773	12.6062	0.545405	1.45943	2.33504	0.00015	0.00330926	yes
XLOC_019458	XLOC_019458	Arc	chr7:115907088-115914815	11.1591	16.2818	0.545042	1.45906	2.03815	0.0003	0.00606217	yes
XLOC_020530	XLOC_020530	Aasdhppt	chr8:1439329-1450095	77.2868	112.738	0.544678	1.45869	2.8587	0.0001	0.00233161	yes
XLOC_002381	XLOC_002381	Rhod	chr1:219668351-219682287	16.7596	24.3988	0.541828	1.45582	2.10787	0.00035	0.006883	yes
XLOC_004202	XLOC_004202	Kctd11	chr10:56489551-56491715	8.94849	12.9967	0.538432	1.45239	2.18449	0.0004	0.00766099	yes
XLOC_016409	XLOC_016409	Cc2d1b	chr5:128215710-128230807	9.27552	13.4707	0.538327	1.45229	2.20092	0.0001	0.00233161	yes
XLOC_017358	XLOC_017358	-	chr5:24420802-24422287	7.07205	10.2649	0.537524	1.45148	1.92134	0.0038	0.0447117	yes
XLOC_005654	XLOC_005654	Trip6	chr12:22451595-22456003	32.5451	47.2013	0.536387	1.45034	2.55903	5e-05	0.00128863	yes
XLOC_003717	XLOC_003717	Hexim1	chr10:91200873-91202986	15.0635	21.8249	0.534919	1.44886	2.36907	0.0003	0.00606217	yes
XLOC_000475	XLOC_000475	Tead2	chr1:101213776-101235633	18.1166	26.246	0.534781	1.44872	2.28861	0.0001	0.00233161	yes
XLOC_006516	XLOC_006516	Kdsr	chr13:26776251-26812451	7.7771	11.2513	0.532789	1.44672	1.89049	0.0015	0.0218771	yes
XLOC_001733	XLOC_001733	Fxyd5	chr1:89464850-89474252	40.345	58.3628	0.532661	1.44659	2.10828	0.0002	0.00422515	yes
XLOC_014874	XLOC_014874	-	chr4:56547626-56550585	10.3461	14.9364	0.529737	1.44367	1.97828	0.0039	0.0454663	yes
XLOC_005899	XLOC_005899	Mafk	chr12:16923983-16934706	22.1046	31.8805	0.52833	1.44226	2.24671	0.0001	0.00233161	yes
XLOC_021895	XLOC_021895	Ptprn	chr9:82446624-82461878	22.326	32.1377	0.525537	1.43947	2.22767	0.00015	0.00330926	yes
XLOC_018630	XLOC_018630	Rnf126	chr7:12820653-12831824	18.2027	26.1894	0.524835	1.43877	2.01767	0.0038	0.0447117	yes
XLOC_013507	XLOC_013507	Nnat	chr3:154043872-154046333	26.0275	37.423	0.523891	1.43783	2.09956	0.00025	0.00516407	yes
XLOC_008782	XLOC_008782	-	chr16:64766724-64778180	9.45468	13.5829	0.522689	1.43663	2.01846	0.0015	0.0218771	yes
XLOC_014338	XLOC_014338	Scand1	chr3:152381664-152448105	37.3317	53.5488	0.520452	1.4344	2.48968	0.001	0.0158263	yes
XLOC_006358	XLOC_006358	-	chr13:79376501-79389407	9.6306	13.8129	0.52032	1.43427	2.18927	0.0005	0.00914895	yes
XLOC_014804	XLOC_014804	Steap1	chr4:25435825-25446405	12.9365	18.554	0.520285	1.43424	1.69698	0.0042	0.0480005	yes
XLOC_010877	XLOC_010877	Terc	chr2:116432722-116433110	123.081	176.459	0.519725	1.43368	3.77709	0.0003	0.00606217	yes
XLOC_016635	XLOC_016635	Epha2	chr5:159845772-159874210	83.4783	119.583	0.518542	1.43251	2.26998	5e-05	0.00128863	yes
XLOC_019266	XLOC_019266	Dram1	chr7:28898646-28932701	9.97368	14.2834	0.518143	1.43211	2.04846	0.0004	0.00766099	yes
XLOC_021595	XLOC_021595	-	chr9:98490444-98500822	11.9608	17.1107	0.516588	1.43057	2.02337	0.0005	0.00914895	yes
XLOC_005656	XLOC_005656	Ache	chr12:22468776-22477052	29.9793	42.88	0.516336	1.43032	2.26088	0.00085	0.013894	yes
XLOC_005785	XLOC_005785	Kctd10	chr12:47992110-48010543	82.3759	117.773	0.515717	1.4297	2.26259	5e-05	0.00128863	yes
XLOC_005807	XLOC_005807	Pus1	chr12:51936707-51945931	12.2479	17.4673	0.512125	1.42615	1.72721	0.0034	0.0413306	yes
XLOC_003867	XLOC_003867	Snn	chr10:4578468-4644570	20.5996	29.3635	0.51141	1.42544	1.69593	0.00345	0.0417927	yes
XLOC_016623	XLOC_016623	Aldh4a1	chr5:158090237-158115725	19.1761	27.3265	0.51099	1.42503	2.32285	0.0002	0.00422515	yes
XLOC_009740	XLOC_009740	MGC108823	chr18:55483058-55589657	35.2231	50.0929	0.508086	1.42216	1.98779	0.0008	0.0132475	yes
XLOC_020926	XLOC_020926	RGD1309079	chr8:102140712-102159828	22.2968	31.6604	0.505842	1.41995	2.06539	0.0004	0.00766099	yes
XLOC_017204	XLOC_017204	Lypla2	chr5:154315005-154319629	21.206	30.0215	0.501524	1.41571	2.02038	0.00065	0.0111338	yes
XLOC_007458	XLOC_007458	Gas2l1	chr14:85308442-85318409	19.4199	27.4463	0.499074	1.41331	2.06056	0.00035	0.006883	yes
XLOC_015417	XLOC_015417	Sema3d	chr4:19222511-19413523	7.59489	10.7224	0.49753	1.41179	1.935	0.0009	0.0145072	yes
XLOC_009452	XLOC_009452	Nudt5	chr17:76359037-76410604	29.6655	41.8411	0.496135	1.41043	1.69074	0.00275	0.0353069	yes
XLOC_022760	XLOC_022760	Timm8a1	chrX:105351713-105355722	18.1005	25.5191	0.495543	1.40985	2.16791	0.0012	0.0183662	yes
XLOC_004313	XLOC_004313	Wsb1	chr10:66586854-66603162	19.3282	27.2242	0.494185	1.40852	2.06737	0.0004	0.00766099	yes
XLOC_001081	XLOC_001081	Bscl2	chr1:225033920-225046148	31.0239	43.6506	0.49262	1.407	2.0017	0.00045	0.00844462	yes
XLOC_016319	XLOC_016319	Slc31a1	chr5:78133188-78251559	59.3135	83.3608	0.491008	1.40543	1.7705	0.0021	0.0285105	yes
XLOC_017319	XLOC_017319	Atad3a	chr5:173189588-173211029	12.2048	17.1412	0.49002	1.40446	1.96705	0.0007	0.0118018	yes
XLOC_017968	XLOC_017968	-	chr6:137285387-137313110	14.0034	19.6291	0.487219	1.40174	2.1576	0.0002	0.00422515	yes
XLOC_001089	XLOC_001089	Tut1	chr1:225151402-225162446	7.24823	10.1568	0.486741	1.40128	1.7955	0.0017	0.0240153	yes
XLOC_016333	XLOC_016333	Tlr4	chr5:82587306-82606072	7.85407	11.0025	0.486316	1.40086	1.83651	0.00105	0.0164681	yes
XLOC_003409	XLOC_003409	Dlg4	chr10:56627193-56655516	8.31748	11.6471	0.485748	1.40031	1.84018	0.00195	0.0267607	yes
XLOC_019581	XLOC_019581	RGD1304694	chr7:125853581-125893214	24.4089	34.1522	0.484572	1.39917	1.92765	0.00075	0.0125237	yes
XLOC_000089	XLOC_000089	Ppp1r14c	chr1:39811313-39923059	17.2628	24.0859	0.480522	1.39525	1.93007	0.0011	0.0171175	yes
XLOC_020426	XLOC_020426	Gpx1	chr8:117117429-117118528	101.332	141.359	0.480279	1.39501	2.61736	0.00015	0.00330926	yes
XLOC_001403	XLOC_001403	Sgk1	chr1:24185450-24193567	30.9326	43.1383	0.479842	1.39459	2.06272	0.00035	0.006883	yes
XLOC_006288	XLOC_006288	Arl8a	chr13:51972973-51981976	12.3081	17.1589	0.479342	1.39411	2.01123	0.0017	0.0240153	yes
XLOC_000364	XLOC_000364	Samd4b	chr1:85337804-85362241	8.50475	11.8483	0.478341	1.39314	2.06332	0.0007	0.0118018	yes
XLOC_007724	XLOC_007724	Lgals3	chr15:24153601-24165537	166.275	231.45	0.477127	1.39197	2.60027	0.0002	0.00422515	yes
XLOC_017251	XLOC_017251	Ddi2	chr5:160231005-160282864	14.356	19.8942	0.470695	1.38578	1.82591	0.0013	0.0195112	yes
XLOC_007129	XLOC_007129	Patz1	chr14:83508658-83528898	13.2973	18.4196	0.470108	1.38521	1.68014	0.00435	0.0492706	yes
XLOC_001680	XLOC_001680	Gmfg	chr1:85312478-85322871	46.1814	63.949	0.469608	1.38473	1.79522	0.00175	0.0244491	yes
XLOC_013746	XLOC_013746	Ncs1	chr3:10553588-10603115	20.3857	28.2028	0.468282	1.38346	1.85307	0.00115	0.0176786	yes
XLOC_020649	XLOC_020649	St3gal4	chr8:36264745-36314829	17.8504	24.6918	0.468081	1.38327	1.90329	0.00065	0.0111338	yes
XLOC_013755	XLOC_013755	Cdk9	chr3:11742268-11747117	26.3685	36.464	0.46766	1.38286	2.19274	0.001	0.0158263	yes
XLOC_020029	XLOC_020029	Thyn1	chr8:28045092-28053974	34.6794	47.9316	0.466897	1.38213	2.29121	0.00115	0.0176786	yes
XLOC_007410	XLOC_007410	Ppp2r2c	chr14:78676778-78902363	17.0616	23.5766	0.466606	1.38185	1.88246	0.0011	0.0171175	yes
XLOC_018637	XLOC_018637	Ppap2c	chr7:13062203-13070282	19.7733	27.2998	0.465333	1.38064	1.89636	0.0009	0.0145072	yes
XLOC_014258	XLOC_014258	Flrt3	chr3:134683165-134696640	12.699	17.5164	0.46399	1.37935	1.88045	0.00075	0.0125237	yes
XLOC_018977	XLOC_018977	Pim3	chr7:129856466-129863441	19.2359	26.513	0.4629	1.37831	2.0848	0.0008	0.0132475	yes
XLOC_015400	XLOC_015400	Armc10	chr4:10004845-10020017	28.9853	39.935	0.462332	1.37777	2.17662	0.0004	0.00766099	yes
XLOC_007755	XLOC_007755	Abhd4	chr15:32894385-32907818	59.4803	81.8553	0.460665	1.37618	2.03831	0.00035	0.006883	yes
XLOC_003680	XLOC_003680	Coasy	chr10:88992389-88996772	7.9429	10.9267	0.460117	1.37565	1.61961	0.0039	0.0454663	yes
XLOC_001832	XLOC_001832	Cyth2	chr1:101796348-101803192	56.8193	77.982	0.45676	1.37246	2.03124	0.0003	0.00606217	yes
XLOC_005778	XLOC_005778	Acads	chr12:47254452-47263750	23.4733	32.1397	0.453337	1.3692	1.88027	0.00075	0.0125237	yes
XLOC_001739	XLOC_001739	Gramd1a	chr1:89563632-89585654	9.16443	12.5353	0.45188	1.36782	1.75304	0.00245	0.0323182	yes
XLOC_014794	XLOC_014794	Gnai1	chr4:13405094-13487634	7.63824	10.4408	0.450926	1.36692	1.73962	0.00245	0.0323182	yes
XLOC_011778	XLOC_011778	Ampd2	chr2:210861623-210874306	10.9722	14.9872	0.449883	1.36593	1.8395	0.00145	0.0212814	yes
XLOC_012531	XLOC_012531	Ppp1r18	chr20:3368970-3397039	25.72	35.0549	0.446726	1.36294	1.6905	0.00365	0.0433861	yes
XLOC_008375	XLOC_008375	Eaf1	chr16:7573748-7602966	12.9506	17.6446	0.446205	1.36245	1.69825	0.00355	0.0426704	yes
XLOC_000318	XLOC_000318	Xrcc1	chr1:81413287-81441680	16.4095	22.3252	0.444147	1.36051	1.81816	0.00185	0.0256152	yes
XLOC_017831	XLOC_017831	-	chr6:110624169-110640944	24.2762	33.0275	0.444127	1.36049	1.95141	0.0007	0.0118018	yes
XLOC_007266	XLOC_007266	Ccng2	chr14:16267571-16276068	15.2008	20.6581	0.442559	1.35901	1.96739	0.00135	0.0200672	yes
XLOC_015075	XLOC_015075	Capg	chr4:100402307-100419450	85.3563	115.915	0.4415	1.35802	1.92576	0.0009	0.0145072	yes
XLOC_020410	XLOC_020410	Hyal2	chr8:116325256-116329012	29.0972	39.5014	0.441022	1.35757	1.89347	0.0011	0.0171175	yes
XLOC_020232	XLOC_020232	Sema7a	chr8:62723787-62746534	11.0905	15.0348	0.438983	1.35565	1.74983	0.003	0.0377518	yes
XLOC_020397	XLOC_020397	Rrp9	chr8:115179898-115188551	19.9341	27.0041	0.437942	1.35467	1.97613	0.0029	0.036893	yes
XLOC_007782	XLOC_007782	Nop9	chr15:34431356-34444244	17.8072	24.1221	0.437901	1.35463	1.96841	0.0015	0.0218771	yes
XLOC_019056	XLOC_019056	Prr13	chr7:144064930-144068236	60.9851	82.4995	0.435928	1.35278	2.33106	0.00185	0.0256152	yes
XLOC_018585	XLOC_018585	Ncln	chr7:11081431-11091809	27.9441	37.7518	0.434005	1.35098	1.91295	0.0008	0.0132475	yes
XLOC_016537	XLOC_016537	Marcksl1	chr5:147714162-147716486	16.9602	22.8998	0.433181	1.35021	1.90569	0.00325	0.0401015	yes
XLOC_017227	XLOC_017227	Nbl1	chr5:157524568-157535701	55.7805	75.3016	0.43292	1.34996	2.11323	0.00085	0.013894	yes
XLOC_019567	XLOC_019567	Rrp7a	chr7:123963380-123990139	9.0532	12.2173	0.43243	1.3495	1.78417	0.00175	0.0244491	yes
XLOC_010525	XLOC_010525	Bcar1	chr19:43932495-43967437	37.3873	50.4388	0.431987	1.34909	1.91353	0.00085	0.013894	yes
XLOC_006626	XLOC_006626	Ier5	chr13:72742209-72744302	44.7381	60.3494	0.431833	1.34895	2.08218	0.00075	0.0125237	yes
XLOC_018212	XLOC_018212	Gpx2	chr6:99839959-99843245	77.0842	103.705	0.427982	1.34535	2.21179	0.00155	0.0224887	yes
XLOC_005422	XLOC_005422	Ydjc	chr11:88090920-88092756	22.7951	30.6503	0.427178	1.3446	1.93958	0.00385	0.0451097	yes
XLOC_019576	XLOC_019576	Ttll12	chr7:124472024-124491061	25.6112	34.4167	0.426331	1.34381	1.87051	0.00105	0.0164681	yes
XLOC_008619	XLOC_008619	Gnl3	chr16:7097579-7103580	24.9036	33.4273	0.424673	1.34227	1.77742	0.00245	0.0323182	yes
XLOC_016833	XLOC_016833	Sigmar1	chr5:58121821-58124680	66.5947	89.3592	0.424209	1.34184	1.85391	0.00155	0.0224887	yes
XLOC_010450	XLOC_010450	Junb	chr19:26092971-26094756	77.3627	103.635	0.421802	1.3396	2.08233	0.00115	0.0176786	yes
XLOC_014809	XLOC_014809	Cldn12	chr4:25681579-25692551	11.3869	15.2517	0.421595	1.33941	1.75273	0.0021	0.0285105	yes
XLOC_019097	XLOC_019097	Gdf11	chr7:3306862-3315856	11.9324	15.9741	0.420855	1.33872	1.86865	0.0016	0.0230463	yes
XLOC_002483	XLOC_002483	Tmem132a	chr1:226897852-226924739	44.3818	59.3668	0.419687	1.33764	1.83738	0.0013	0.0195112	yes
XLOC_009608	XLOC_009608	Impact	chr18:4325871-4346736	16.3841	21.9059	0.419024	1.33702	1.89559	0.0017	0.0240153	yes
XLOC_005606	XLOC_005606	Ttyh3	chr12:16084107-16112673	22.6793	30.2995	0.417919	1.336	1.84432	0.0014	0.0207441	yes
XLOC_021015	XLOC_021015	Nradd	chr8:118890406-118893612	71.7145	95.7926	0.417651	1.33575	1.77506	0.0017	0.0240153	yes
XLOC_016678	XLOC_016678	Klhl21	chr5:169180816-169190073	12.4808	16.655	0.416237	1.33444	1.71736	0.00295	0.0373586	yes
XLOC_009644	XLOC_009644	-	chr18:27558446-27573492	8.25996	11.022	0.416182	1.33439	1.72297	0.0028	0.0358169	yes
XLOC_003449	XLOC_003449	Tax1bp3	chr10:59741771-59748062	191.511	255.473	0.415744	1.33399	1.67684	0.0037	0.0439056	yes
XLOC_008953	XLOC_008953	Habp4	chr17:1679580-1702256	17.9958	24.006	0.41573	1.33397	1.70664	0.00295	0.0373586	yes
XLOC_012343	XLOC_012343	Pwp2	chr20:11228700-11243203	12.1309	16.1794	0.41547	1.33373	1.72413	0.0025	0.0328534	yes
XLOC_012907	XLOC_012907	-	chr3:8701801-8718509	11.8162	15.7516	0.414736	1.33305	1.83048	0.00245	0.0323182	yes
XLOC_003149	XLOC_003149	Clcn7	chr10:14492646-14518170	11.4497	15.2531	0.413789	1.33218	1.6567	0.00415	0.0475069	yes
XLOC_002416	XLOC_002416	Fam89b,Sssca1	chr1:221085887-221089586	54.6644	72.8107	0.413548	1.33196	1.88369	0.0035	0.042215	yes
XLOC_021291	XLOC_021291	Mllt1	chr9:10110388-10155302	14.2544	18.9456	0.410455	1.3291	1.76903	0.0027	0.0348253	yes
XLOC_018889	XLOC_018889	Apol3	chr7:118685021-118694035	28.1772	37.4237	0.409425	1.32816	1.67286	0.0035	0.042215	yes
XLOC_019165	XLOC_019165	Thop1	chr7:11501148-11513489	16.002	21.229	0.407783	1.32665	1.81667	0.00425	0.0483737	yes
XLOC_003195	XLOC_003195	Adam19	chr10:31146106-31240581	17.1464	22.7149	0.405736	1.32476	1.84099	0.00205	0.0279679	yes
XLOC_001063	XLOC_001063	Ppp1r14b	chr1:222229834-222231945	233.814	309.567	0.40489	1.32399	2.38439	0.002	0.027366	yes
XLOC_012275	XLOC_012275	Ddah2	chr20:5049493-5052573	38.2721	50.6616	0.404597	1.32372	1.70809	0.0032	0.0396601	yes
XLOC_018793	XLOC_018793	Laptm4b	chr7:72924910-72968097	28.0533	37.1104	0.403655	1.32286	1.89073	0.00345	0.0417927	yes
XLOC_017209	XLOC_017209	Kdm1a	chr5:154909002-154965239	34.1306	45.118	0.402637	1.32192	1.79535	0.0019	0.0261259	yes
XLOC_016711	XLOC_016711	Mxra8	chr5:173288372-173293077	38.8166	51.3045	0.402412	1.32172	1.77281	0.00245	0.0323182	yes
XLOC_008748	XLOC_008748	Casp3	chr16:48844945-48863206	44.5325	58.6882	0.398211	1.31787	1.76172	0.0019	0.0261259	yes
XLOC_000906	XLOC_000906	Glrx3	chr1:209768635-209799905	183.017	241.093	0.397614	1.31733	1.77545	0.00205	0.0279679	yes
XLOC_019644	XLOC_019644	Rnd1	chr7:140349137-140356216	49.7847	65.5747	0.397438	1.31717	1.74877	0.00255	0.0333221	yes
XLOC_004482	XLOC_004482	Fam134c	chr10:89006594-89030721	23.7391	31.2306	0.395696	1.31558	1.7283	0.00225	0.0301651	yes
XLOC_016679	XLOC_016679	-	chr5:169213006-169233578	10.7811	14.1817	0.395524	1.31542	1.76303	0.0036	0.0429015	yes
XLOC_021974	XLOC_021974	Rab31	chr9:113370071-113504606	20.3709	26.7793	0.394605	1.31458	1.80196	0.0034	0.0413306	yes
XLOC_000144	XLOC_000144	-	chr1:60871736-60894896	13.1764	17.3211	0.394574	1.31455	1.70715	0.00365	0.0433861	yes
XLOC_011011	XLOC_011011	-	chr2:187892853-187902590	13.614	17.8894	0.394016	1.31405	1.77239	0.00195	0.0267607	yes
XLOC_003469	XLOC_003469	Cluh	chr10:61432498-61454445	10.9677	14.4056	0.393367	1.31346	1.70596	0.00335	0.0410449	yes
XLOC_002584	XLOC_002584	Noc3l	chr1:257468784-257498892	13.209	17.3483	0.393275	1.31337	1.61999	0.00425	0.0483737	yes
XLOC_012743	XLOC_012743	Amd1	chr20:45384000-45399694	29.9862	39.3738	0.392936	1.31306	1.73338	0.00295	0.0373586	yes
XLOC_002017	XLOC_002017	Inppl1	chr1:166893733-166913629	30.4435	39.863	0.388914	1.30941	1.73783	0.00335	0.0410449	yes
XLOC_005082	XLOC_005082	Ppp1r2	chr11:72748677-73036414	82.4452	107.685	0.38531	1.30614	1.8106	0.00275	0.0353069	yes
XLOC_016982	XLOC_016982	Jun	chr5:114011185-114014277	26.3025	34.2622	0.381421	1.30262	1.77654	0.0028	0.0358169	yes
XLOC_021011	XLOC_021011	Dhx30	chr8:118160138-118192409	18.0429	23.4923	0.380752	1.30202	1.65717	0.004	0.0462454	yes
XLOC_011296	XLOC_011296	Rhobtb3	chr2:2627298-2683685	21.2715	27.5628	0.373797	1.29576	1.66149	0.00395	0.0458575	yes
XLOC_022621	XLOC_022621	Ubqln2	chrX:18723312-18726732	38.475	49.7553	0.370929	1.29319	1.74042	0.0039	0.0454663	yes
