# Supplementary material for: The Role of miR-217-5p in the Puromycin Aminonucleoside-Induced Morphological Change of Podocytes
Source: Noncoding RNA. 2022 Jun 8;8(3):43. doi: 10.3390/ncrna8030043 (PMC9229466; doi:10.3390/ncrna8030043)
Supplement: Supplementary file 1 [file ncrna-08-00043-s001.zip › Table_S4_MinRevise.xlsx]

## Sheet: FPKM>10, FC<0.8
test_id	gene_id	gene	locus	sample_1	sample_2	status	value_1	value_2	log2(fold_change)	fold_change	test_stat	p_value	q_value	significant
XLOC_008195	XLOC_008195	Rgcc	chr15:61551860-61564695	Control	PAN	OK	11.9256	2.19114	-2.44431	0.183734	-6.03391	5e-05	0.00128863	yes
XLOC_014903	XLOC_014903	Cald1	chr4:62103840-62290229	Control	PAN	OK	964.412	212.057	-2.18519	0.219883	-7.79916	5e-05	0.00128863	yes
XLOC_011711	XLOC_011711	-	chr2:198390423-198390852	Control	PAN	OK	10.4662	2.31052	-2.17945	0.22076	-4.82387	0.00025	0.00516407	yes
XLOC_016648	XLOC_016648	Dhrs3	chr5:162808355-162843387	Control	PAN	OK	13.8297	3.29613	-2.06893	0.238336	-5.73132	5e-05	0.00128863	yes
XLOC_021910	XLOC_021910	-	chr9:86424697-86572095	Control	PAN	OK	19.0561	5.03864	-1.91915	0.26441	-4.08782	5e-05	0.00128863	yes
XLOC_002562	XLOC_002562	Prkg1	chr1:248977685-250300952	Control	PAN	OK	17.4934	4.63936	-1.91482	0.265205	-3.41522	5e-05	0.00128863	yes
XLOC_006339	XLOC_006339	Nphs2	chr13:73929135-73941522	Control	PAN	OK	102.24	27.5006	-1.89443	0.26898	-8.6302	5e-05	0.00128863	yes
XLOC_017553	XLOC_017553	Crim1	chr6:788478-962755	Control	PAN	OK	169.978	46.8323	-1.85977	0.27552	-7.51481	5e-05	0.00128863	yes
XLOC_022615	XLOC_022615	Shroom4	chrX:16719567-16930029	Control	PAN	OK	42.4338	11.7344	-1.85446	0.276536	-7.69968	5e-05	0.00128863	yes
XLOC_009544	XLOC_009544	-	chr17:43817287-43817641	Control	PAN	OK	18.6476	5.22757	-1.83478	0.280334	-5.68499	0.00015	0.00330926	yes
XLOC_011860	XLOC_011860	Pdlim5	chr2:247809939-247989513	Control	PAN	OK	297.982	85.1759	-1.80671	0.285842	-5.98969	5e-05	0.00128863	yes
XLOC_015225	XLOC_015225	Cxcl12	chr4:149261043-149273891	Control	PAN	OK	15.8949	4.54514	-1.80617	0.285949	-5.53098	5e-05	0.00128863	yes
XLOC_016935	XLOC_016935	Tnc	chr5:79789612-79874581	Control	PAN	OK	224.475	65.7581	-1.77131	0.292943	-6.43955	5e-05	0.00128863	yes
XLOC_015335	XLOC_015335	Ptpro	chr4:171250737-171461756	Control	PAN	OK	51.5355	15.1214	-1.76898	0.293416	-7.54115	5e-05	0.00128863	yes
XLOC_003064	XLOC_003064	Myh11	chr10:764413-859184	Control	PAN	OK	10.6912	3.15027	-1.76287	0.294661	-6.99766	5e-05	0.00128863	yes
XLOC_005368	XLOC_005368	Lpp	chr11:79192442-79828985	Control	PAN	OK	51.6008	15.5171	-1.73354	0.300713	-5.32653	5e-05	0.00128863	yes
XLOC_006637	XLOC_006637	Tdrd5	chr13:73872636-73922198	Control	PAN	OK	10.2701	3.09621	-1.72987	0.301479	-5.73037	5e-05	0.00128863	yes
XLOC_021485	XLOC_021485	Pard3b	chr9:68413798-69430694	Control	PAN	OK	15.7915	4.7913	-1.72066	0.30341	-5.7419	5e-05	0.00128863	yes
XLOC_013354	XLOC_013354	Mertk	chr3:121235094-121342768	Control	PAN	OK	44.2524	13.7131	-1.6902	0.309884	-6.88878	5e-05	0.00128863	yes
XLOC_011434	XLOC_011434	Npr3	chr2:61883931-61951474	Control	PAN	OK	188.9	58.5717	-1.68935	0.310067	-4.97921	5e-05	0.00128863	yes
XLOC_019409	XLOC_019409	Tnfrsf11b	chr7:93798579-93826586	Control	PAN	OK	59.3158	18.397	-1.68895	0.310153	-7.78004	5e-05	0.00128863	yes
XLOC_011455	XLOC_011455	Car3	chr2:88126515-88136140	Control	PAN	OK	154.275	48.0039	-1.68428	0.311158	-5.94378	5e-05	0.00128863	yes
XLOC_018224	XLOC_018224	Actn1	chr6:103375647-103472696	Control	PAN	OK	516.188	162.886	-1.66403	0.315556	-6.38764	5e-05	0.00128863	yes
XLOC_008755	XLOC_008755	Sorbs2	chr16:49626097-49820962	Control	PAN	OK	84.5028	27.2602	-1.6322	0.322596	-7.09611	5e-05	0.00128863	yes
XLOC_011439	XLOC_011439	Cdh6	chr2:63096225-63247631	Control	PAN	OK	126.365	41.1394	-1.619	0.325561	-6.02096	5e-05	0.00128863	yes
XLOC_020962	XLOC_020962	Bfsp2	chr8:111908613-112265632	Control	PAN	OK	23.2006	7.7423	-1.58333	0.333711	-5.49654	5e-05	0.00128863	yes
XLOC_010825	XLOC_010825	Sema5a	chr2:85377317-85809213	Control	PAN	OK	11.6461	3.90424	-1.57673	0.335241	-6.6908	5e-05	0.00128863	yes
XLOC_019506	XLOC_019506	Myh9,Myh9l1	chr7:118740004-119071722	Control	PAN	OK	23.8802	8.03571	-1.57132	0.3365	-6.4834	5e-05	0.00128863	yes
XLOC_014348	XLOC_014348	Tgm2	chr3:154597165-154627317	Control	PAN	OK	21.9079	7.3981	-1.56622	0.337692	-6.42878	5e-05	0.00128863	yes
XLOC_005186	XLOC_005186	Robo2	chr11:11062865-11585534	Control	PAN	OK	92.4911	31.3773	-1.55959	0.339247	-5.47404	5e-05	0.00128863	yes
XLOC_010575	XLOC_010575	Acta1	chr19:56674071-56677084	Control	PAN	OK	83.2968	28.2924	-1.55784	0.339659	-7.13398	5e-05	0.00128863	yes
XLOC_008261	XLOC_008261	-	chr15:23882172-23882824	Control	PAN	OK	32.6714	11.3104	-1.53037	0.346189	-5.98365	5e-05	0.00128863	yes
XLOC_000045	XLOC_000045	Enpp3	chr1:21613104-21684482	Control	PAN	OK	19.979	6.99786	-1.5135	0.35026	-5.79721	5e-05	0.00128863	yes
XLOC_021909	XLOC_021909	-	chr9:86312465-86419020	Control	PAN	OK	10.8581	3.82342	-1.50584	0.352125	-5.89368	5e-05	0.00128863	yes
XLOC_003727	XLOC_003727	Itgb3	chr10:92667805-92786714	Control	PAN	OK	12.2565	4.33633	-1.499	0.353799	-5.11246	5e-05	0.00128863	yes
XLOC_009210	XLOC_009210	Plxdc2	chr17:83218438-83619478	Control	PAN	OK	91.1726	33.007	-1.46583	0.362027	-5.27741	5e-05	0.00128863	yes
XLOC_021736	XLOC_021736	Clic5	chr9:19100480-19372745	Control	PAN	OK	21.3001	7.75503	-1.45766	0.364083	-4.33178	5e-05	0.00128863	yes
XLOC_017842	XLOC_017842	Flrt2	chr6:119519455-119613770	Control	PAN	OK	96.0409	35.0411	-1.4546	0.364856	-5.49568	5e-05	0.00128863	yes
XLOC_015621	XLOC_015621	Fam13a	chr4:89183183-89281352	Control	PAN	OK	41.5429	15.2227	-1.44838	0.366433	-5.83747	5e-05	0.00128863	yes
XLOC_010399	XLOC_010399	Large	chr19:12481553-12943637	Control	PAN	OK	58.7122	21.9986	-1.41625	0.374685	-5.98337	5e-05	0.00128863	yes
XLOC_016945	XLOC_016945	-	chr5:92862194-93398980	Control	PAN	OK	43.2983	16.2449	-1.41432	0.375187	-5.94691	5e-05	0.00128863	yes
XLOC_011178	XLOC_011178	Col11a1	chr2:216863309-217056523	Control	PAN	OK	106.545	40.1384	-1.4084	0.376729	-5.91598	5e-05	0.00128863	yes
XLOC_015965	XLOC_015965	Rps4y2	chr4:182625033-182844951	Control	PAN	OK	10.9089	4.16751	-1.38824	0.382031	-3.8572	5e-05	0.00128863	yes
XLOC_021876	XLOC_021876	Tns1	chr9:81190029-81400987	Control	PAN	OK	31.0048	11.86	-1.38638	0.382523	-6.00651	5e-05	0.00128863	yes
XLOC_015726	XLOC_015726	Slc6a6	chr4:123638617-123713462	Control	PAN	OK	198.61	76.6077	-1.37438	0.385718	-5.45685	5e-05	0.00128863	yes
XLOC_008472	XLOC_008472	-	chr16:31686916-31948444	Control	PAN	OK	197.858	76.5303	-1.37036	0.386795	-5.00404	5e-05	0.00128863	yes
XLOC_004009	XLOC_004009	-	chr10:20663707-20694365	Control	PAN	OK	20.2571	7.87762	-1.3626	0.388881	-5.22328	5e-05	0.00128863	yes
XLOC_020762	XLOC_020762	Ncam1	chr8:53836723-54134863	Control	PAN	OK	72.2244	28.303	-1.35153	0.391876	-4.90015	5e-05	0.00128863	yes
XLOC_014810	XLOC_014810	Cdk14	chr4:25825280-26419533	Control	PAN	OK	50.5393	19.8364	-1.34926	0.392493	-5.92512	5e-05	0.00128863	yes
XLOC_002569	XLOC_002569	Acta2	chr1:252537613-252550394	Control	PAN	OK	340.083	134.04	-1.34322	0.39414	-6.48525	5e-05	0.00128863	yes
XLOC_017565	XLOC_017565	Tmem178a	chr6:3657264-3716106	Control	PAN	OK	10.6583	4.21179	-1.33947	0.395166	-3.91481	5e-05	0.00128863	yes
XLOC_005327	XLOC_005327	Mylk	chr11:69013059-69223158	Control	PAN	OK	18.496	7.31191	-1.33889	0.395325	-5.31202	5e-05	0.00128863	yes
XLOC_004237	XLOC_004237	Spns2	chr10:59000372-59049668	Control	PAN	OK	75.7866	30.074	-1.33343	0.396824	-3.52198	5e-05	0.00128863	yes
XLOC_004010	XLOC_004010	-	chr10:20694770-20818678	Control	PAN	OK	18.1395	7.23311	-1.32644	0.398751	-4.67896	5e-05	0.00128863	yes
XLOC_018031	XLOC_018031	Ltbp1	chr6:21203278-21600442	Control	PAN	OK	55.7028	22.553	-1.30443	0.404881	-5.63879	5e-05	0.00128863	yes
XLOC_011589	XLOC_011589	Golim4	chr2:174311978-174413678	Control	PAN	OK	125.067	50.793	-1.3	0.406126	-5.34997	5e-05	0.00128863	yes
XLOC_011487	XLOC_011487	Fndc3b	chr2:113109748-113415588	Control	PAN	OK	53.6435	21.857	-1.29531	0.407449	-5.27114	5e-05	0.00128863	yes
XLOC_011617	XLOC_011617	Kirrel	chr2:186420744-186516709	Control	PAN	OK	120.659	49.4657	-1.28644	0.409961	-4.94298	5e-05	0.00128863	yes
XLOC_005657	XLOC_005657	Serpine1	chr12:22640942-22651486	Control	PAN	OK	1726.69	710.974	-1.28014	0.411756	-3.6763	5e-05	0.00128863	yes
XLOC_021980	XLOC_021980	Ptprm	chr9:114846092-115556100	Control	PAN	OK	29.2337	12.0681	-1.27644	0.412813	-5.17516	5e-05	0.00128863	yes
XLOC_002581	XLOC_002581	Myof	chr1:256585409-256735360	Control	PAN	OK	138.017	57.1811	-1.27124	0.414304	-5.13828	5e-05	0.00128863	yes
XLOC_009360	XLOC_009360	Dcdc2	chr17:41838163-42084680	Control	PAN	OK	45.8319	19.0767	-1.26454	0.416232	-5.07314	5e-05	0.00128863	yes
XLOC_002576	XLOC_002576	Ankrd1	chr1:254726983-254757590	Control	PAN	OK	45.5769	19.179	-1.24878	0.420804	-5.14654	5e-05	0.00128863	yes
XLOC_000543	XLOC_000543	Igf1r	chr1:128923761-129214034	Control	PAN	OK	40.0814	16.87	-1.24847	0.420894	-4.76282	5e-05	0.00128863	yes
XLOC_002276	XLOC_002276	-	chr1:205951745-206281071	Control	PAN	OK	46.0014	19.43	-1.24339	0.422379	-5.49356	5e-05	0.00128863	yes
XLOC_006776	XLOC_006776	Tgfb2	chr13:105039534-105141785	Control	PAN	OK	92.6977	39.2656	-1.23927	0.423587	-5.14108	5e-05	0.00128863	yes
XLOC_003579	XLOC_003579	2016-09-04	chr10:74871028-74884407	Control	PAN	OK	24.2279	10.2744	-1.23762	0.424072	-4.56465	5e-05	0.00128863	yes
XLOC_001349	XLOC_001349	Utrn	chr1:6451811-6971143	Control	PAN	OK	22.8305	9.69427	-1.23576	0.424619	-5.39073	5e-05	0.00128863	yes
XLOC_014071	XLOC_014071	Tspan18	chr3:82081870-82236691	Control	PAN	OK	21.7029	9.30865	-1.22124	0.428914	-2.78483	5e-05	0.00128863	yes
XLOC_004322	XLOC_004322	Myo1d	chr10:67531988-68142950	Control	PAN	OK	97.8256	42.0857	-1.21688	0.430212	-3.14329	5e-05	0.00128863	yes
XLOC_013830	XLOC_013830	Rbms1	chr3:46802588-47025394	Control	PAN	OK	51.1192	22.0394	-1.21378	0.431138	-4.9368	5e-05	0.00128863	yes
XLOC_021750	XLOC_021750	-	chr9:26162347-26660764	Control	PAN	OK	10.9035	4.75726	-1.19659	0.436305	-2.62539	5e-05	0.00128863	yes
XLOC_004711	XLOC_004711	-	chr10:20662996-20663564	Control	PAN	OK	16.0292	6.99416	-1.19648	0.436339	-3.79951	5e-05	0.00128863	yes
XLOC_015182	XLOC_015182	Lmcd1	chr4:144192964-144252554	Control	PAN	OK	15.0277	6.56748	-1.19421	0.437026	-3.98488	5e-05	0.00128863	yes
XLOC_009541	XLOC_009541	-	chr17:43616218-43616727	Control	PAN	OK	33.044	14.6505	-1.17344	0.443363	-4.83474	5e-05	0.00128863	yes
XLOC_007721	XLOC_007721	Samd4a	chr15:23664949-23882097	Control	PAN	OK	57.3563	25.4324	-1.17328	0.443412	-4.24383	5e-05	0.00128863	yes
XLOC_019407	XLOC_019407	Ext1	chr7:92605015-92882054	Control	PAN	OK	49.1491	21.8255	-1.17115	0.444067	-5.12201	5e-05	0.00128863	yes
XLOC_007269	XLOC_007269	Shroom3	chr14:16622433-16902267	Control	PAN	OK	34.5819	15.3991	-1.16717	0.445294	-5.13758	5e-05	0.00128863	yes
XLOC_004463	XLOC_004463	Krt17	chr10:88158992-88163712	Control	PAN	OK	44.5982	19.8636	-1.16686	0.44539	-5.00253	5e-05	0.00128863	yes
XLOC_011427	XLOC_011427	Rai14	chr2:60545918-60683451	Control	PAN	OK	68.9364	30.839	-1.16051	0.447354	-5.10684	5e-05	0.00128863	yes
XLOC_020021	XLOC_020021	Cnn1	chr8:23113017-23121755	Control	PAN	OK	51.2368	23.0398	-1.15305	0.449674	-4.7256	5e-05	0.00128863	yes
XLOC_007927	XLOC_007927	Mbnl2	chr15:105640096-105797935	Control	PAN	OK	66.1751	29.7676	-1.15254	0.449833	-5.09335	5e-05	0.00128863	yes
XLOC_005070	XLOC_005070	Kalrn	chr11:69484112-70026009	Control	PAN	OK	11.3703	5.13724	-1.14621	0.451811	-4.85053	5e-05	0.00128863	yes
XLOC_016028	XLOC_016028	-	chr4:66435695-66436226	Control	PAN	OK	14.1021	6.39988	-1.13979	0.453826	-3.53336	0.00035	0.006883	yes
XLOC_020487	XLOC_020487	Ctdspl	chr8:127065291-127726251	Control	PAN	OK	34.9993	15.9302	-1.13556	0.455158	-3.33585	5e-05	0.00128863	yes
XLOC_011193	XLOC_011193	Arhgap29	chr2:225552070-225613354	Control	PAN	OK	289.064	131.634	-1.13486	0.455379	-4.24365	5e-05	0.00128863	yes
XLOC_017667	XLOC_017667	Rrm2	chr6:43884579-43890818	Control	PAN	OK	22.6704	10.3589	-1.12994	0.456935	-4.56888	5e-05	0.00128863	yes
XLOC_018707	XLOC_018707	Ntn4	chr7:34533542-34649330	Control	PAN	OK	47.8988	21.9696	-1.12448	0.458667	-5.21423	5e-05	0.00128863	yes
XLOC_003375	XLOC_003375	Myh10	chr10:55275410-55444861	Control	PAN	OK	38.6589	17.8515	-1.11476	0.461768	-3.9203	5e-05	0.00128863	yes
XLOC_012379	XLOC_012379	Bicc1	chr20:18688052-18938511	Control	PAN	OK	66.269	30.8292	-1.10404	0.465212	-4.78524	5e-05	0.00128863	yes
XLOC_009915	XLOC_009915	Mcc	chr18:35489273-35876559	Control	PAN	OK	34.3686	16.0124	-1.1019	0.465903	-3.7304	5e-05	0.00128863	yes
XLOC_020641	XLOC_020641	Ntm	chr8:30039365-30503276	Control	PAN	OK	10.3211	4.85168	-1.08904	0.470074	-3.61502	5e-05	0.00128863	yes
XLOC_007171	XLOC_007171	Egfr	chr14:99919317-100104137	Control	PAN	OK	81.2997	38.5427	-1.07679	0.474082	-3.8372	5e-05	0.00128863	yes
XLOC_003541	XLOC_003541	Ccl2	chr10:69412064-69413863	Control	PAN	OK	392.81	186.611	-1.0738	0.475066	-5.91748	5e-05	0.00128863	yes
XLOC_021738	XLOC_021738	Rcan2	chr9:19518567-19749402	Control	PAN	OK	38.2168	18.3537	-1.05813	0.480254	-4.5604	5e-05	0.00128863	yes
XLOC_015511	XLOC_015511	Podxl	chr4:58827609-58875753	Control	PAN	OK	55.7241	26.7864	-1.0568	0.480697	-4.59529	5e-05	0.00128863	yes
XLOC_007252	XLOC_007252	Arhgap24	chr14:8383315-8549044	Control	PAN	OK	55.8274	26.9436	-1.05103	0.482623	-4.54013	5e-05	0.00128863	yes
XLOC_011803	XLOC_011803	Cdc14a	chr2:219302576-219483884	Control	PAN	OK	17.7071	8.56977	-1.047	0.483974	-3.89175	5e-05	0.00128863	yes
XLOC_009493	XLOC_009493	-	chr17:4846127-4849523	Control	PAN	OK	25.5921	12.3889	-1.04665	0.484091	-4.49864	5e-05	0.00128863	yes
XLOC_010121	XLOC_010121	Cdh11	chr19:2391263-2551245	Control	PAN	OK	55.6628	27.0538	-1.04088	0.486031	-4.57649	5e-05	0.00128863	yes
XLOC_014870	XLOC_014870	Snd1	chr4:55772356-56171672	Control	PAN	OK	89.0527	43.2889	-1.04066	0.486105	-4.89888	5e-05	0.00128863	yes
XLOC_013013	XLOC_013013	Tanc1	chr3:45683679-45917854	Control	PAN	OK	41.1077	19.9967	-1.03964	0.486449	-4.38917	5e-05	0.00128863	yes
XLOC_000778	XLOC_000778	Mical2	chr1:177048625-177173733	Control	PAN	OK	66.9662	32.8579	-1.02719	0.490665	-4.06163	5e-05	0.00128863	yes
XLOC_020863	XLOC_020863	Tpm1	chr8:72814737-72841496	Control	PAN	OK	2126.85	1043.89	-1.02674	0.490818	-3.28506	5e-05	0.00128863	yes
XLOC_000102	XLOC_000102	-	chr1:45881095-46233825	Control	PAN	OK	11.6274	5.72463	-1.02227	0.492341	-4.23999	5e-05	0.00128863	yes
XLOC_016309	XLOC_016309	Akap2	chr5:74942010-74985789	Control	PAN	OK	183.779	90.5294	-1.02151	0.492601	-3.99998	5e-05	0.00128863	yes
XLOC_012729	XLOC_012729	Man1a1	chr20:35257673-35450160	Control	PAN	OK	14.0042	6.95361	-1.01002	0.496539	-3.93768	5e-05	0.00128863	yes
XLOC_008731	XLOC_008731	Hmgb2	chr16:36077616-36080191	Control	PAN	OK	16.9298	8.40675	-1.00995	0.496563	-3.15511	5e-05	0.00128863	yes
XLOC_007250	XLOC_007250	Ptpn13	chr14:7688393-7864403	Control	PAN	OK	42.2834	21.0032	-1.00948	0.496725	-4.44397	5e-05	0.00128863	yes
XLOC_009080	XLOC_009080	Gmds	chr17:33408721-33938086	Control	PAN	OK	22.6642	11.2935	-1.00492	0.498298	-4.17559	5e-05	0.00128863	yes
XLOC_022308	XLOC_022308	Rps6ka3	chrX:37469691-37576057	Control	PAN	OK	21.2493	10.5895	-1.00479	0.498343	-3.82059	5e-05	0.00128863	yes
XLOC_012383	XLOC_012383	Cdk1	chr20:20576376-20591509	Control	PAN	OK	27.4477	13.7071	-1.00176	0.49939	-3.64645	5e-05	0.00128863	yes
XLOC_007490	XLOC_007490	Cobl	chr14:92342907-92524591	Control	PAN	OK	20.6484	10.3248	-0.999921	0.500027	-4.26001	5e-05	0.00128863	yes
XLOC_007939	XLOC_007939	LOC681383	chr15:1268122-2346236	Control	PAN	OK	10.1446	5.07518	-0.999187	0.500282	-2.40828	5e-05	0.00128863	yes
XLOC_000602	XLOC_000602	Me3	chr1:153791278-154057434	Control	PAN	OK	23.9681	12.0451	-0.992669	0.502547	-3.72461	5e-05	0.00128863	yes
XLOC_007046	XLOC_007046	-	chr14:43374947-43526948	Control	PAN	OK	20.945	10.6121	-0.980903	0.506663	-4.27558	5e-05	0.00128863	yes
XLOC_015070	XLOC_015070	St3gal5	chr4:99934864-99999922	Control	PAN	OK	132.723	67.2935	-0.979876	0.507023	-4.25815	5e-05	0.00128863	yes
XLOC_021751	XLOC_021751	-	chr9:26661474-26736754	Control	PAN	OK	10.3571	5.25738	-0.9782	0.507613	-3.75271	5e-05	0.00128863	yes
XLOC_017288	XLOC_017288	Spsb1	chr5:166913732-166978595	Control	PAN	OK	38.0443	19.3423	-0.975923	0.508414	-4.08509	5e-05	0.00128863	yes
XLOC_008516	XLOC_008516	Rbpms	chr16:61954579-62110239	Control	PAN	OK	69.8993	35.5586	-0.97508	0.508712	-3.53581	5e-05	0.00128863	yes
XLOC_005664	XLOC_005664	-	chr12:23401516-23453420	Control	PAN	OK	16.0624	8.17949	-0.973602	0.509233	-4.30945	5e-05	0.00128863	yes
XLOC_009390	XLOC_009390	Hist1h2ak	chr17:44840989-44841382	Control	PAN	OK	55.025	28.064	-0.971367	0.510023	-4.98339	0.0001	0.00233161	yes
XLOC_015531	XLOC_015531	Hipk2	chr4:66436755-66625025	Control	PAN	OK	18.3526	9.37862	-0.968536	0.511024	-4.04076	5e-05	0.00128863	yes
XLOC_007930	XLOC_007930	Farp1	chr15:106376546-106722039	Control	PAN	OK	45.1527	23.3149	-0.953559	0.516357	-3.40658	5e-05	0.00128863	yes
XLOC_008502	XLOC_008502	Mtus1	chr16:54241003-54450426	Control	PAN	OK	32.6384	16.8723	-0.951913	0.516947	-4.23315	5e-05	0.00128863	yes
XLOC_012443	XLOC_012443	Fyn	chr20:44436224-44630295	Control	PAN	OK	44.8695	23.2663	-0.947489	0.518534	-3.74104	5e-05	0.00128863	yes
XLOC_009474	XLOC_009474	Nebl	chr17:84136184-84489259	Control	PAN	OK	16.6814	8.69934	-0.939261	0.5215	-3.99296	5e-05	0.00128863	yes
XLOC_020420	XLOC_020420	Gmppb	chr8:116826679-116856593	Control	PAN	OK	14.4676	7.55891	-0.936576	0.522471	-2.31951	0.00035	0.006883	yes
XLOC_009377	XLOC_009377	Hist1h1a	chr17:43614100-43614844	Control	PAN	OK	32.2003	16.8388	-0.935287	0.522938	-3.9897	5e-05	0.00128863	yes
XLOC_017703	XLOC_017703	-	chr6:60747090-60784747	Control	PAN	OK	11.6834	6.11487	-0.934068	0.52338	-3.7726	5e-05	0.00128863	yes
XLOC_015433	XLOC_015433	Cdk6	chr4:27776702-27970107	Control	PAN	OK	68.5181	35.8939	-0.932746	0.52386	-2.82188	5e-05	0.00128863	yes
XLOC_017654	XLOC_017654	-	chr6:38474539-38777071	Control	PAN	OK	16.7323	8.77222	-0.931621	0.524269	-4.05997	5e-05	0.00128863	yes
XLOC_015597	XLOC_015597	Hibadh	chr4:82604357-82702523	Control	PAN	OK	107.542	56.7307	-0.922704	0.527519	-4.00655	5e-05	0.00128863	yes
XLOC_009649	XLOC_009649	Ctnna1	chr18:27923571-28055966	Control	PAN	OK	245.122	129.317	-0.922591	0.527561	-3.9491	5e-05	0.00128863	yes
XLOC_019307	XLOC_019307	Pawr	chr7:51273751-51353754	Control	PAN	OK	117.715	62.2581	-0.918964	0.528889	-3.85044	5e-05	0.00128863	yes
XLOC_004556	XLOC_004556	Prkca	chr10:96186401-96585227	Control	PAN	OK	11.1413	5.89458	-0.918459	0.529074	-3.39203	5e-05	0.00128863	yes
XLOC_005036	XLOC_005036	Cd200	chr11:60371373-60398515	Control	PAN	OK	237.845	125.924	-0.917469	0.529437	-3.91014	5e-05	0.00128863	yes
XLOC_007944	XLOC_007944	Vcl	chr15:3455210-3544685	Control	PAN	OK	243.85	129.211	-0.916265	0.529879	-3.70231	5e-05	0.00128863	yes
XLOC_011201	XLOC_011201	Sec24d	chr2:227455703-227563085	Control	PAN	OK	24.8176	13.1623	-0.914945	0.530364	-3.92456	5e-05	0.00128863	yes
XLOC_014897	XLOC_014897	Exoc4	chr4:60549125-61357404	Control	PAN	OK	22.2722	11.833	-0.912429	0.53129	-3.84852	5e-05	0.00128863	yes
XLOC_021461	XLOC_021461	Spats2l	chr9:64643544-64843961	Control	PAN	OK	22.8836	12.1675	-0.911283	0.531712	-3.63283	5e-05	0.00128863	yes
XLOC_002146	XLOC_002146	St5	chr1:174136956-174330559	Control	PAN	OK	27.7654	14.7634	-0.911264	0.531719	-3.98999	5e-05	0.00128863	yes
XLOC_009781	XLOC_009781	Ldlrad4	chr18:63717416-64044058	Control	PAN	OK	58.1999	30.9761	-0.909861	0.532236	-2.27871	5e-05	0.00128863	yes
XLOC_020799	XLOC_020799	Peak1	chr8:60863849-61157611	Control	PAN	OK	13.8881	7.39363	-0.909495	0.532371	-3.40724	5e-05	0.00128863	yes
XLOC_001880	XLOC_001880	Tjp1	chr1:126146291-126403383	Control	PAN	OK	87.8122	46.8328	-0.906902	0.533329	-3.97013	5e-05	0.00128863	yes
XLOC_016674	XLOC_016674	Errfi1	chr5:167951519-167966011	Control	PAN	OK	62.8555	33.5532	-0.905589	0.533815	-3.94482	5e-05	0.00128863	yes
XLOC_008043	XLOC_008043	Slc7a7	chr15:33013354-33059730	Control	PAN	OK	31.5484	16.8421	-0.905493	0.53385	-3.82271	5e-05	0.00128863	yes
XLOC_016736	XLOC_016736	Sulf1	chr5:5999422-6186731	Control	PAN	OK	29.7162	15.9	-0.90222	0.535063	-3.78809	5e-05	0.00128863	yes
XLOC_002668	XLOC_002668	Afap1l2	chr1:277730759-277827284	Control	PAN	OK	36.4169	19.487	-0.9021	0.535107	-3.94891	5e-05	0.00128863	yes
XLOC_015456	XLOC_015456	Thsd7a	chr4:38658510-39103572	Control	PAN	OK	15.9566	8.54547	-0.900923	0.535544	-3.29226	5e-05	0.00128863	yes
XLOC_007363	XLOC_007363	-	chr14:44954965-45012297	Control	PAN	OK	12.601	6.7556	-0.899385	0.536115	-2.63484	5e-05	0.00128863	yes
XLOC_011207	XLOC_011207	Camk2d	chr2:230900908-231132039	Control	PAN	OK	40.164	21.5328	-0.899371	0.53612	-3.5849	5e-05	0.00128863	yes
XLOC_011336	XLOC_011336	F2rl2	chr2:26163160-26438825	Control	PAN	OK	13.2422	7.17205	-0.884682	0.541607	-3.71843	5e-05	0.00128863	yes
XLOC_005005	XLOC_005005	Col8a1	chr11:44877228-45009348	Control	PAN	OK	117.212	63.4932	-0.88445	0.541694	-3.15926	5e-05	0.00128863	yes
XLOC_019427	XLOC_019427	Mtss1	chr7:98820695-98960909	Control	PAN	OK	37.1738	20.1496	-0.883536	0.542037	-3.88261	5e-05	0.00128863	yes
XLOC_018683	XLOC_018683	Nuak1	chr7:25037537-25113669	Control	PAN	OK	94.8557	51.4594	-0.8823	0.542502	-3.6641	5e-05	0.00128863	yes
XLOC_009417	XLOC_009417	Bambi	chr17:56905418-56909675	Control	PAN	OK	17.1812	9.36282	-0.875818	0.544945	-3.12715	5e-05	0.00128863	yes
XLOC_009310	XLOC_009310	Mylip	chr17:19682039-19703681	Control	PAN	OK	11.9083	6.50171	-0.873081	0.54598	-3.54393	5e-05	0.00128863	yes
XLOC_021981	XLOC_021981	Arhgap28	chr9:116055594-116223028	Control	PAN	OK	61.0634	33.5094	-0.865742	0.548764	-3.6827	5e-05	0.00128863	yes
XLOC_001225	XLOC_001225	Plce1	chr1:257157198-257465259	Control	PAN	OK	12.2412	6.7225	-0.86467	0.549172	-2.86161	5e-05	0.00128863	yes
XLOC_005372	XLOC_005372	St6gal1	chr11:80927598-80998744	Control	PAN	OK	83.8048	46.0912	-0.862541	0.549983	-3.81259	5e-05	0.00128863	yes
XLOC_001376	XLOC_001376	Ptprk	chr1:17445203-18058242	Control	PAN	OK	15.9998	8.79993	-0.862486	0.550004	-3.55627	5e-05	0.00128863	yes
XLOC_010696	XLOC_010696	-	chr2:20458470-20702902	Control	PAN	OK	30.3469	16.6989	-0.861802	0.550265	-3.42295	5e-05	0.00128863	yes
XLOC_019341	XLOC_019341	Srgap1	chr7:63968667-64251726	Control	PAN	OK	14.0441	7.73996	-0.859569	0.551117	-2.56311	5e-05	0.00128863	yes
XLOC_021916	XLOC_021916	Pid1	chr9:91666001-91883756	Control	PAN	OK	60.168	33.2404	-0.85606	0.552459	-3.97535	5e-05	0.00128863	yes
XLOC_021863	XLOC_021863	Rpe	chr9:73687699-73816195	Control	PAN	OK	48.5816	26.8991	-0.852853	0.553689	-2.72002	5e-05	0.00128863	yes
XLOC_001438	XLOC_001438	Cnksr3	chr1:43789704-43884294	Control	PAN	OK	18.1311	10.0897	-0.845584	0.556485	-3.47138	5e-05	0.00128863	yes
XLOC_013233	XLOC_013233	Lgr4	chr3:101051433-101153320	Control	PAN	OK	28.6317	15.9479	-0.844245	0.557002	-3.4952	5e-05	0.00128863	yes
XLOC_015139	XLOC_015139	Mgll	chr4:120671423-120773462	Control	PAN	OK	42.1777	23.5842	-0.838659	0.559163	-3.20001	5e-05	0.00128863	yes
XLOC_007973	XLOC_007973	Flnb	chr15:18750148-18883040	Control	PAN	OK	148.327	83.2807	-0.832724	0.561468	-3.20841	5e-05	0.00128863	yes
XLOC_000781	XLOC_000781	Tead1	chr1:177495658-177714832	Control	PAN	OK	17.3329	9.75906	-0.828696	0.563038	-2.19408	0.0002	0.00422515	yes
XLOC_010360	XLOC_010360	Nrp1	chr19:61332350-61486309	Control	PAN	OK	49.439	27.9531	-0.822641	0.565406	-3.45654	5e-05	0.00128863	yes
XLOC_000121	XLOC_000121	Qk	chr1:50828060-51061929	Control	PAN	OK	63.5412	35.0289	-0.821821	0.565727	-2.77786	5e-05	0.00128863	yes
XLOC_016599	XLOC_016599	Luzp1	chr5:154831737-154907634	Control	PAN	OK	63.4607	35.9428	-0.82016	0.566379	-3.62641	5e-05	0.00128863	yes
XLOC_010555	XLOC_010555	Slc7a5	chr19:54693958-54722563	Control	PAN	OK	33.3122	18.8811	-0.819111	0.566791	-3.49534	5e-05	0.00128863	yes
XLOC_007017	XLOC_007017	Hopx	chr14:33335579-33362551	Control	PAN	OK	26.1261	14.812	-0.81872	0.566945	-2.86413	5e-05	0.00128863	yes
XLOC_001689	XLOC_001689	Actn4	chr1:87066288-87147308	Control	PAN	OK	319.589	181.257	-0.818179	0.567157	-3.18843	5e-05	0.00128863	yes
XLOC_020355	XLOC_020355	Plod2	chr8:99976947-100059735	Control	PAN	OK	199.753	113.315	-0.817879	0.567275	-3.39595	5e-05	0.00128863	yes
XLOC_016282	XLOC_016282	Col15a1	chr5:62840323-62950240	Control	PAN	OK	11.2943	6.40792	-0.817668	0.567358	-3.18528	5e-05	0.00128863	yes
XLOC_006684	XLOC_006684	Pbx1	chr13:86386809-86671461	Control	PAN	OK	14.569	8.28446	-0.814425	0.568635	-2.7038	5e-05	0.00128863	yes
XLOC_022139	XLOC_022139	-	chr9:120098984-120101065	Control	PAN	OK	13.8963	7.91805	-0.81148	0.569797	-3.23801	5e-05	0.00128863	yes
XLOC_006231	XLOC_006231	Mgat5	chr13:43850743-44157861	Control	PAN	OK	15.6561	8.93629	-0.808978	0.570786	-3.03224	5e-05	0.00128863	yes
XLOC_008951	XLOC_008951	Npepo	chr17:558183-955930	Control	PAN	OK	16.4855	9.431	-0.805716	0.572078	-1.58703	0.00435	0.0492706	yes
XLOC_021870	XLOC_021870	Fn1	chr9:78899860-78969289	Control	PAN	OK	389.365	223.04	-0.803824	0.572829	-2.38462	0.0002	0.00422515	yes
XLOC_009797	XLOC_009797	Zbtb7c	chr18:72124956-72462748	Control	PAN	OK	13.3321	7.64758	-0.801831	0.573621	-3.26462	5e-05	0.00128863	yes
XLOC_011192	XLOC_011192	F3	chr2:225310685-225322281	Control	PAN	OK	154.219	88.6374	-0.798996	0.574749	-3.51463	5e-05	0.00128863	yes
XLOC_016046	XLOC_016046	-	chr4:80951676-80953286	Control	PAN	OK	60.6434	34.8752	-0.798149	0.575087	-3.84411	5e-05	0.00128863	yes
XLOC_017768	XLOC_017768	-	chr6:99041006-99063833	Control	PAN	OK	12.213	7.02829	-0.797175	0.575475	-2.54589	5e-05	0.00128863	yes
XLOC_006434	XLOC_006434	Spta1	chr13:92264230-92340658	Control	PAN	OK	12.9629	7.47514	-0.79422	0.576655	-3.44189	5e-05	0.00128863	yes
XLOC_021583	XLOC_021583	Ackr3	chr9:97355923-97367447	Control	PAN	OK	97.5422	56.3479	-0.791665	0.577677	-3.65676	5e-05	0.00128863	yes
XLOC_022780	XLOC_022780	Tsc22d3	chrX:111884284-111942622	Control	PAN	OK	65.358	37.7944	-0.790191	0.578268	-3.38392	5e-05	0.00128863	yes
XLOC_020197	XLOC_020197	-	chr8:57885912-57963762	Control	PAN	OK	15.8591	9.19874	-0.785806	0.580028	-3.45641	5e-05	0.00128863	yes
XLOC_002673	XLOC_002673	Hspa12a	chr1:279946810-280015358	Control	PAN	OK	10.1372	5.89315	-0.782545	0.58134	-3.24197	5e-05	0.00128863	yes
XLOC_020288	XLOC_020288	Myo1e	chr8:76644595-76840567	Control	PAN	OK	58.6832	34.1312	-0.781856	0.581618	-3.29649	5e-05	0.00128863	yes
XLOC_017702	XLOC_017702	-	chr6:60374524-60731303	Control	PAN	OK	18.1357	10.5617	-0.779997	0.582368	-2.89845	5e-05	0.00128863	yes
XLOC_015793	XLOC_015793	Wnk1	chr4:152452846-152578475	Control	PAN	OK	58.4323	34.1433	-0.775164	0.584322	-3.3184	5e-05	0.00128863	yes
XLOC_017769	XLOC_017769	-	chr6:99066850-99143487	Control	PAN	OK	10.6633	6.25742	-0.769014	0.586818	-3.14699	5e-05	0.00128863	yes
XLOC_019437	XLOC_019437	Asap1	chr7:104667245-104986157	Control	PAN	OK	20.9317	12.2984	-0.76722	0.587549	-2.8704	5e-05	0.00128863	yes
XLOC_020198	XLOC_020198	Kdelc2	chr8:57964987-57982605	Control	PAN	OK	110.376	65.4176	-0.754676	0.592679	-3.42068	5e-05	0.00128863	yes
XLOC_009838	XLOC_009838	Kctd1	chr18:6374777-6576835	Control	PAN	OK	31.6856	18.895	-0.745824	0.596327	-3.02333	5e-05	0.00128863	yes
XLOC_018790	XLOC_018790	Sdc2	chr7:71572472-71686233	Control	PAN	OK	169.594	101.146	-0.745646	0.596401	-3.07094	5e-05	0.00128863	yes
XLOC_010921	XLOC_010921	Lhfp	chr2:142262235-142461980	Control	PAN	OK	58.1181	34.6793	-0.744913	0.596704	-3.1867	5e-05	0.00128863	yes
XLOC_011294	XLOC_011294	Wls	chr2:266315035-266431218	Control	PAN	OK	263.766	157.394	-0.744875	0.59672	-3.13068	5e-05	0.00128863	yes
XLOC_018005	XLOC_018005	Map4k3	chr6:3276737-3444544	Control	PAN	OK	16.6694	9.95169	-0.744192	0.597002	-3.10883	5e-05	0.00128863	yes
XLOC_007362	XLOC_007362	-	chr14:44941694-44953334	Control	PAN	OK	25.4208	15.3072	-0.731801	0.602152	-3.26226	5e-05	0.00128863	yes
XLOC_000603	XLOC_000603	Picalm	chr1:154377039-154457247	Control	PAN	OK	120.044	72.5139	-0.727229	0.604063	-3.22137	5e-05	0.00128863	yes
XLOC_021580	XLOC_021580	Sh3bp4	chr9:96210749-96288902	Control	PAN	OK	30.3492	18.3914	-0.722629	0.605992	-3.31668	5e-05	0.00128863	yes
XLOC_010804	XLOC_010804	Adamts12	chr2:61039071-61340687	Control	PAN	OK	27.9961	16.9989	-0.719785	0.607188	-3.26577	5e-05	0.00128863	yes
XLOC_011392	XLOC_011392	Map3k1	chr2:43327326-43393419	Control	PAN	OK	14.4244	8.76467	-0.718741	0.607627	-3.00661	5e-05	0.00128863	yes
XLOC_009047	XLOC_009047	Nedd9	chr17:23116660-23179701	Control	PAN	OK	111.407	67.7085	-0.718433	0.607757	-3.23705	5e-05	0.00128863	yes
XLOC_016897	XLOC_016897	Abca1	chr5:69857431-69983035	Control	PAN	OK	26.8404	16.3451	-0.715545	0.608975	-2.99727	5e-05	0.00128863	yes
XLOC_012946	XLOC_012946	Hspa5	chr3:13838303-13842763	Control	PAN	OK	371.174	226.456	-0.712863	0.610108	-3.0937	5e-05	0.00128863	yes
XLOC_007496	XLOC_007496	Meis1	chr14:103181864-103323996	Control	PAN	OK	30.6053	18.6745	-0.71271	0.610173	-2.97099	5e-05	0.00128863	yes
XLOC_019262	XLOC_019262	Hsp90b1	chr7:27226569-27240533	Control	PAN	OK	253.583	154.736	-0.712649	0.610199	-3.15048	5e-05	0.00128863	yes
XLOC_015524	XLOC_015524	Creb3l2	chr4:64865707-64981658	Control	PAN	OK	21.0274	12.8358	-0.712095	0.610433	-2.86014	5e-05	0.00128863	yes
XLOC_022634	XLOC_022634	Shroom2	chrX:23468059-23649958	Control	PAN	OK	14.735	9.00532	-0.710396	0.611152	-2.97952	5e-05	0.00128863	yes
XLOC_010853	XLOC_010853	Cp	chr2:104744442-104832281	Control	PAN	OK	10.8327	6.62571	-0.709251	0.611638	-1.87568	0.0044	0.049756	yes
XLOC_014261	XLOC_014261	-	chr3:138054938-138116937	Control	PAN	OK	28.0077	17.1339	-0.708966	0.611758	-2.32186	0.00015	0.00330926	yes
XLOC_007162	XLOC_007162	Adcy1	chr14:87311362-87430076	Control	PAN	OK	12.2531	7.49944	-0.708295	0.612043	-2.43362	0.00015	0.00330926	yes
XLOC_002441	XLOC_002441	Fkbp2	chr1:222232348-222235102	Control	PAN	OK	36.9426	22.6186	-0.707779	0.612262	-2.3034	0.00015	0.00330926	yes
XLOC_006557	XLOC_006557	Srgap2	chr13:48065273-48287009	Control	PAN	OK	10.6426	6.52674	-0.705421	0.613264	-2.69243	5e-05	0.00128863	yes
XLOC_000093	XLOC_000093	Akap12	chr1:40816129-40906582	Control	PAN	OK	228.04	140.134	-0.70248	0.614515	-2.6418	5e-05	0.00128863	yes
XLOC_008628	XLOC_008628	Sh3bp5	chr16:7473360-7538752	Control	PAN	OK	30.9632	19.046	-0.701071	0.615115	-2.95691	5e-05	0.00128863	yes
XLOC_021968	XLOC_021968	Fbxl17	chr9:110513571-110937661	Control	PAN	OK	17.882	11.022	-0.698123	0.616374	-2.41647	5e-05	0.00128863	yes
XLOC_011089	XLOC_011089	Hist2h3c2	chr2:198417618-198418029	Control	PAN	OK	93.8721	57.948	-0.695937	0.617308	-4.26521	5e-05	0.00128863	yes
XLOC_017778	XLOC_017778	Fut8	chr6:100306692-100537208	Control	PAN	OK	14.4577	8.93006	-0.695093	0.61767	-2.61801	5e-05	0.00128863	yes
XLOC_009413	XLOC_009413	Svil	chr17:55230297-55425958	Control	PAN	OK	15.3251	9.4746	-0.693762	0.61824	-3.02521	5e-05	0.00128863	yes
XLOC_021905	XLOC_021905	Ap1s3	chr9:85387064-85446074	Control	PAN	OK	71.385	42.1168	-0.692639	0.618721	-3.36644	5e-05	0.00128863	yes
XLOC_018258	XLOC_018258	Tgfb3	chr6:109913756-109937554	Control	PAN	OK	296.71	183.656	-0.692044	0.618976	-2.78824	5e-05	0.00128863	yes
XLOC_004370	XLOC_004370	-	chr10:75673719-76040097	Control	PAN	OK	70.1501	43.4347	-0.691597	0.619168	-1.79985	0.00175	0.0244491	yes
XLOC_007979	XLOC_007979	Fermt2	chr15:19807805-19876389	Control	PAN	OK	138.574	85.8984	-0.689951	0.619875	-3.17427	5e-05	0.00128863	yes
XLOC_016217	XLOC_016217	Epha7	chr5:43602704-43761070	Control	PAN	OK	11.8226	7.3322	-0.689224	0.620187	-2.54823	5e-05	0.00128863	yes
XLOC_014232	XLOC_014232	RGD1565616	chr3:123243869-123376466	Control	PAN	OK	23.5879	14.6345	-0.688671	0.620425	-3.01558	5e-05	0.00128863	yes
XLOC_013079	XLOC_013079	-	chr3:71188058-71206253	Control	PAN	OK	173.124	107.478	-0.687773	0.620811	-2.60773	5e-05	0.00128863	yes
XLOC_011445	XLOC_011445	-	chr2:80507637-80770736	Control	PAN	OK	18.7381	11.6386	-0.68706	0.621118	-3.00489	5e-05	0.00128863	yes
XLOC_010872	XLOC_010872	Rpl22l1	chr2:115362798-115364733	Control	PAN	OK	432.424	268.987	-0.684908	0.622045	-4.35843	5e-05	0.00128863	yes
XLOC_018147	XLOC_018147	Prkd1	chr6:71034974-71349510	Control	PAN	OK	11.5744	7.21256	-0.682352	0.623149	-2.63157	5e-05	0.00128863	yes
XLOC_022843	XLOC_022843	Gpc4	chrX:139352158-139464878	Control	PAN	OK	24.1336	15.0493	-0.681349	0.623582	-2.79068	5e-05	0.00128863	yes
XLOC_017657	XLOC_017657	Rock2	chr6:42180862-42289910	Control	PAN	OK	34.033	21.2786	-0.677527	0.625236	-3.0179	5e-05	0.00128863	yes
XLOC_013649	XLOC_013649	Pax8	chr3:1527311-1584949	Control	PAN	OK	31.4711	19.6827	-0.677102	0.62542	-2.87164	5e-05	0.00128863	yes
XLOC_015676	XLOC_015676	Exoc6b	chr4:116314606-116786424	Control	PAN	OK	12.7791	7.99805	-0.676072	0.625867	-2.88275	5e-05	0.00128863	yes
XLOC_020035	XLOC_020035	-	chr8:32016985-32037531	Control	PAN	OK	138.206	86.5354	-0.675461	0.626132	-2.80919	5e-05	0.00128863	yes
XLOC_007945	XLOC_007945	Plau	chr15:3644294-3650806	Control	PAN	OK	20.486	12.8322	-0.674871	0.626388	-2.54341	5e-05	0.00128863	yes
XLOC_001357	XLOC_001357	-	chr1:8592164-8751881	Control	PAN	OK	86.619	54.6918	-0.66336	0.631406	-2.62798	5e-05	0.00128863	yes
XLOC_013768	XLOC_013768	Pbx3	chr3:13240921-13436039	Control	PAN	OK	10.0683	6.3637	-0.66188	0.632054	-2.35983	5e-05	0.00128863	yes
XLOC_008757	XLOC_008757	Fat1	chr16:50372035-50502653	Control	PAN	OK	65.612	41.5537	-0.658982	0.633325	-2.63844	5e-05	0.00128863	yes
XLOC_013898	XLOC_013898	Serping1	chr3:72161221-72171074	Control	PAN	OK	11.1198	7.0528	-0.656857	0.634259	-2.22574	0.00015	0.00330926	yes
XLOC_017880	XLOC_017880	Eml1	chr6:132282550-132451810	Control	PAN	OK	40.0342	25.3965	-0.656606	0.634369	-2.88642	5e-05	0.00128863	yes
XLOC_009284	XLOC_009284	Cks2	chr17:13587663-13593423	Control	PAN	OK	24.9079	15.8855	-0.648887	0.637772	-1.83159	0.0017	0.0240153	yes
XLOC_018248	XLOC_018248	Ltbp2	chr6:108500113-108607294	Control	PAN	OK	14.9433	9.53523	-0.648158	0.638094	-2.82877	5e-05	0.00128863	yes
XLOC_012712	XLOC_012712	Tspan15	chr20:31812556-31857191	Control	PAN	OK	19.2676	12.2951	-0.648092	0.638124	-2.41982	0.0001	0.00233161	yes
XLOC_018712	XLOC_018712	Tmcc3	chr7:35383350-35543759	Control	PAN	OK	24.2427	15.4794	-0.647203	0.638517	-2.85872	5e-05	0.00128863	yes
XLOC_018062	XLOC_018062	Emilin1	chr6:26821150-26829643	Control	PAN	OK	24.923	15.9351	-0.645266	0.639375	-2.77284	5e-05	0.00128863	yes
XLOC_002506	XLOC_002506	Cntf	chr1:229597629-229602346	Control	PAN	OK	14.2435	9.10759	-0.645163	0.639421	-1.93743	0.00095	0.0151554	yes
XLOC_000902	XLOC_000902	Dock1	chr1:206900597-207414852	Control	PAN	OK	18.8589	12.1286	-0.636832	0.643124	-2.77125	5e-05	0.00128863	yes
XLOC_007276	XLOC_007276	Parm1	chr14:17969111-18076942	Control	PAN	OK	34.601	22.2949	-0.634102	0.644342	-1.91732	0.00105	0.0164681	yes
XLOC_022582	XLOC_022582	Usp9x	chrX:10510032-10630297	Control	PAN	OK	50.2579	32.4502	-0.631122	0.645674	-2.67131	5e-05	0.00128863	yes
XLOC_009975	XLOC_009975	Atp8b1	chr18:60013379-60153579	Control	PAN	OK	12.1829	7.86926	-0.630554	0.645928	-2.54253	5e-05	0.00128863	yes
XLOC_004915	XLOC_004915	Gbe1	chr11:7210168-7485895	Control	PAN	OK	26.5236	17.1364	-0.630211	0.646082	-2.86212	5e-05	0.00128863	yes
XLOC_018148	XLOC_018148	Strn3	chr6:72376359-72502777	Control	PAN	OK	50.2345	32.4847	-0.628918	0.646661	-2.82028	5e-05	0.00128863	yes
XLOC_014381	XLOC_014381	Sdc4	chr3:160872502-160891190	Control	PAN	OK	224.427	145.17	-0.628506	0.646846	-2.87584	5e-05	0.00128863	yes
XLOC_005428	XLOC_005428	Pkp2	chr11:88909843-88972213	Control	PAN	OK	107.522	69.5706	-0.628083	0.647036	-2.68924	5e-05	0.00128863	yes
XLOC_005665	XLOC_005665	-	chr12:23463004-23470344	Control	PAN	OK	26.6214	17.2295	-0.627706	0.647205	-2.79426	5e-05	0.00128863	yes
XLOC_014425	XLOC_014425	Bmp7	chr3:170878916-170955924	Control	PAN	OK	28.4328	18.419	-0.626361	0.647808	-2.61867	5e-05	0.00128863	yes
XLOC_007267	XLOC_007267	2016-09-11	chr14:16369203-16453169	Control	PAN	OK	119.828	77.7311	-0.624399	0.64869	-2.76197	5e-05	0.00128863	yes
XLOC_016255	XLOC_016255	Arhgef39	chr5:58995216-59002557	Control	PAN	OK	93.5631	60.7951	-0.621985	0.649776	-2.71655	5e-05	0.00128863	yes
XLOC_015857	XLOC_015857	Tspan9	chr4:160530725-160725038	Control	PAN	OK	43.9802	28.6001	-0.620835	0.650294	-2.75646	5e-05	0.00128863	yes
XLOC_013223	XLOC_013223	Wt1	chr3:95100451-95180575	Control	PAN	OK	25.7256	16.7503	-0.61902	0.651113	-2.27094	0.0001	0.00233161	yes
XLOC_022337	XLOC_022337	Msn	chrX:65226701-65295801	Control	PAN	OK	331.741	216.396	-0.616385	0.652303	-2.34514	5e-05	0.00128863	yes
XLOC_005020	XLOC_005020	Alcam	chr11:50780720-50986923	Control	PAN	OK	59.0857	38.5688	-0.615377	0.652759	-2.59206	5e-05	0.00128863	yes
XLOC_011850	XLOC_011850	Nfkb1	chr2:240773518-240890578	Control	PAN	OK	20.1193	13.1356	-0.615098	0.652886	-2.63571	5e-05	0.00128863	yes
XLOC_013078	XLOC_013078	-	chr3:71113248-71172791	Control	PAN	OK	124.874	81.5905	-0.614006	0.65338	-2.70028	5e-05	0.00128863	yes
XLOC_010359	XLOC_010359	Pard3	chr19:60017438-60580630	Control	PAN	OK	14.3597	9.40824	-0.610032	0.655182	-2.5122	5e-05	0.00128863	yes
XLOC_008482	XLOC_008482	Wwc2	chr16:47368767-47533816	Control	PAN	OK	31.8623	20.8909	-0.608973	0.655663	-2.71277	5e-05	0.00128863	yes
XLOC_002549	XLOC_002549	-	chr1:246380816-246799348	Control	PAN	OK	10.3053	6.76098	-0.608076	0.656071	-1.94425	0.00175	0.0244491	yes
XLOC_012328	XLOC_012328	Zfand3	chr20:8696447-8892572	Control	PAN	OK	48.0858	31.6173	-0.604899	0.657517	-2.65539	5e-05	0.00128863	yes
XLOC_022319	XLOC_022319	Tbl1x	chrX:44830713-44988551	Control	PAN	OK	14.1181	9.28592	-0.604432	0.65773	-2.5578	5e-05	0.00128863	yes
XLOC_010389	XLOC_010389	Herpud1	chr19:11046906-11057254	Control	PAN	OK	24.453	16.085	-0.604295	0.657793	-2.6732	5e-05	0.00128863	yes
XLOC_000665	XLOC_000665	Rrm1	chr1:167538386-167562688	Control	PAN	OK	34.6744	22.8185	-0.603667	0.658079	-2.79138	5e-05	0.00128863	yes
XLOC_009872	XLOC_009872	Nrep	chr18:26183750-26213698	Control	PAN	OK	648.277	427.889	-0.602591	0.65857	-1.83268	0.00115	0.0176786	yes
XLOC_015568	XLOC_015568	Pdia4	chr4:77470533-77489535	Control	PAN	OK	147.382	97.1516	-0.601247	0.659184	-2.64743	5e-05	0.00128863	yes
XLOC_020455	XLOC_020455	Map4	chr8:118013149-118159934	Control	PAN	OK	44.092	29.0822	-0.600378	0.659581	-2.6575	5e-05	0.00128863	yes
XLOC_005942	XLOC_005942	Vgf	chr12:22677508-22680782	Control	PAN	OK	11.6638	7.69445	-0.600146	0.659687	-2.2853	5e-05	0.00128863	yes
XLOC_005330	XLOC_005330	Itgb5	chr11:70056497-70172164	Control	PAN	OK	92.5175	61.1133	-0.59824	0.660559	-2.61573	5e-05	0.00128863	yes
XLOC_007334	XLOC_007334	Rasl11b	chr14:36549607-36554579	Control	PAN	OK	20.9602	13.8465	-0.59813	0.66061	-2.29887	0.0002	0.00422515	yes
XLOC_011543	XLOC_011543	Wwtr1	chr2:147573971-147694006	Control	PAN	OK	126.757	83.8026	-0.596994	0.66113	-2.17387	0.00015	0.00330926	yes
XLOC_012021	XLOC_012021	-	chr2:150879888-150882918	Control	PAN	OK	31.1822	20.6204	-0.596649	0.661288	-2.74265	5e-05	0.00128863	yes
XLOC_005200	XLOC_005200	App	chr11:24425009-24642431	Control	PAN	OK	310.836	205.63	-0.596103	0.661538	-2.37429	5e-05	0.00128863	yes
XLOC_019695	XLOC_019695	Krt8	chr7:143596507-143604505	Control	PAN	OK	282.152	187.284	-0.591247	0.663769	-2.19683	0.00015	0.00330926	yes
XLOC_013003	XLOC_013003	-	chr3:38399984-38677633	Control	PAN	OK	19.5687	12.9972	-0.590347	0.664183	-2.55085	5e-05	0.00128863	yes
XLOC_019444	XLOC_019444	Ndrg1	chr7:107734324-107776025	Control	PAN	OK	11.2634	7.48136	-0.590271	0.664218	-2.26609	5e-05	0.00128863	yes
XLOC_018047	XLOC_018047	Bre	chr6:25666651-26128763	Control	PAN	OK	22.1301	14.7046	-0.58974	0.664463	-2.42798	0.0002	0.00422515	yes
XLOC_018976	XLOC_018976	Creld2	chr7:129812726-129819641	Control	PAN	OK	24.6689	16.393	-0.589612	0.664522	-2.19944	0.0001	0.00233161	yes
XLOC_022753	XLOC_022753	Pcdh19	chrX:104387185-104493915	Control	PAN	OK	14.0053	9.32033	-0.587526	0.665483	-2.25347	0.00015	0.00330926	yes
XLOC_020164	XLOC_020164	Fxyd6	chr8:49676534-49703419	Control	PAN	OK	17.8303	11.8872	-0.584925	0.666684	-2.14055	0.0001	0.00233161	yes
XLOC_011444	XLOC_011444	-	chr2:80471396-80504439	Control	PAN	OK	14.8054	9.87093	-0.584868	0.66671	-2.51571	5e-05	0.00128863	yes
XLOC_011870	XLOC_011870	Cyr61	chr2:251529353-251532312	Control	PAN	OK	216.278	144.244	-0.584374	0.666939	-2.78718	5e-05	0.00128863	yes
XLOC_013849	XLOC_013849	Lrp2	chr3:55665152-55822735	Control	PAN	OK	12.0261	8.03446	-0.581891	0.668088	-2.56809	5e-05	0.00128863	yes
XLOC_007943	XLOC_007943	Adk	chr15:3033489-3435888	Control	PAN	OK	34.0223	22.7346	-0.581593	0.668226	-2.41574	5e-05	0.00128863	yes
XLOC_021486	XLOC_021486	Nrp2	chr9:69496793-69612089	Control	PAN	OK	13.0482	8.71955	-0.581528	0.668256	-2.30773	5e-05	0.00128863	yes
XLOC_007970	XLOC_007970	Pxk	chr15:18548204-18616589	Control	PAN	OK	13.469	9.00527	-0.580804	0.668591	-2.14216	0.0001	0.00233161	yes
XLOC_002519	XLOC_002519	Tle4	chr1:231394521-231531384	Control	PAN	OK	11.0774	7.40702	-0.580651	0.668662	-2.34014	5e-05	0.00128863	yes
XLOC_016846	XLOC_016846	Tpm2	chr5:59016620-59025631	Control	PAN	OK	260.129	174.026	-0.579924	0.668999	-2.53789	5e-05	0.00128863	yes
XLOC_007489	XLOC_007489	Grb10	chr14:92021842-92118756	Control	PAN	OK	62.7874	42.0442	-0.578569	0.669628	-2.55556	5e-05	0.00128863	yes
XLOC_002153	XLOC_002153	Sbf2	chr1:174948362-175420208	Control	PAN	OK	14.0628	9.43061	-0.576462	0.670606	-2.53577	5e-05	0.00128863	yes
XLOC_012399	XLOC_012399	Lims1	chr20:27895810-28004740	Control	PAN	OK	93.0267	62.5609	-0.572384	0.672505	-2.02966	0.00035	0.006883	yes
XLOC_001272	XLOC_001272	Gbf1	chr1:265904614-266033329	Control	PAN	OK	13.2561	8.92047	-0.571463	0.672934	-2.47379	5e-05	0.00128863	yes
XLOC_019933	XLOC_019933	Casp4	chr8:2635889-2651687	Control	PAN	OK	11.6832	7.86562	-0.570804	0.673241	-1.74346	0.00295	0.0373586	yes
XLOC_021769	XLOC_021769	-	chr9:37902052-38202172	Control	PAN	OK	18.3142	12.342	-0.569393	0.6739	-2.42728	5e-05	0.00128863	yes
XLOC_010946	XLOC_010946	Mbnl1	chr2:150727376-150869518	Control	PAN	OK	47.7533	32.2018	-0.568461	0.674336	-2.2564	5e-05	0.00128863	yes
XLOC_022906	XLOC_022906	Rbmx	chrX:159880992-159891402	Control	PAN	OK	12.1049	8.17075	-0.567049	0.674996	-1.81967	0.00215	0.0291043	yes
XLOC_018715	XLOC_018715	Eea1	chr7:37018687-37189981	Control	PAN	OK	16.5842	11.2015	-0.566125	0.675429	-2.45416	5e-05	0.00128863	yes
XLOC_011770	XLOC_011770	Csf1	chr2:210522370-210550546	Control	PAN	OK	32.635	22.0813	-0.563598	0.676613	-2.45304	5e-05	0.00128863	yes
XLOC_021369	XLOC_021369	Cd2ap	chr9:20764758-20861941	Control	PAN	OK	71.3458	48.2867	-0.563203	0.676798	-2.12064	0.00045	0.00844462	yes
XLOC_005302	XLOC_005302	Tmem39a	chr11:64721129-64752546	Control	PAN	OK	14.8836	10.0752	-0.562911	0.676935	-1.95994	0.00095	0.0151554	yes
XLOC_003227	XLOC_003227	Rnf130	chr10:35537973-35610732	Control	PAN	OK	31.5454	21.3747	-0.561523	0.677586	-2.15095	0.00035	0.006883	yes
XLOC_006455	XLOC_006455	Cdc42bpa	chr13:98231046-98451052	Control	PAN	OK	16.4004	11.1227	-0.56022	0.678199	-2.43073	0.0001	0.00233161	yes
XLOC_020877	XLOC_020877	Tcf12	chr8:78341199-78658233	Control	PAN	OK	25.1838	17.0844	-0.559819	0.678387	-1.97143	0.00055	0.00976898	yes
XLOC_001211	XLOC_001211	Pcgf5	chr1:254974788-255090898	Control	PAN	OK	18.3519	12.4689	-0.557593	0.679435	-1.76781	0.00225	0.0301651	yes
XLOC_008592	XLOC_008592	Col4a1	chr16:83522161-83632156	Control	PAN	OK	195.647	132.941	-0.557465	0.679495	-2.14645	0.0004	0.00766099	yes
XLOC_005309	XLOC_005309	Fstl1	chr11:65791195-65845716	Control	PAN	OK	826.903	562.141	-0.556786	0.679815	-1.7883	0.00225	0.0301651	yes
XLOC_009949	XLOC_009949	Synpo	chr18:55862924-55891710	Control	PAN	OK	34.0906	23.1762	-0.556732	0.67984	-2.36101	0.0001	0.00233161	yes
XLOC_020295	XLOC_020295	Nedd4	chr8:79323407-79408841	Control	PAN	OK	332.32	225.978	-0.556393	0.68	-2.08435	0.00035	0.006883	yes
XLOC_022464	XLOC_022464	Pls3	chrX:119030418-119124257	Control	PAN	OK	141.114	96.1642	-0.553292	0.681463	-2.55663	5e-05	0.00128863	yes
XLOC_019308	XLOC_019308	Ppp1r12a	chr7:51404656-51517410	Control	PAN	OK	27.1755	18.5267	-0.552701	0.681743	-2.33759	0.0001	0.00233161	yes
XLOC_013361	XLOC_013361	Sirpa	chr3:122114022-122152478	Control	PAN	OK	10.4058	7.09627	-0.552248	0.681957	-2.12103	0.00015	0.00330926	yes
XLOC_019335	XLOC_019335	-	chr7:62850504-62972478	Control	PAN	OK	53.3445	36.4158	-0.550778	0.682652	-2.46672	5e-05	0.00128863	yes
XLOC_016880	XLOC_016880	Erp44	chr5:63936714-64031062	Control	PAN	OK	61.6767	42.1859	-0.547965	0.683984	-2.27202	0.00025	0.00516407	yes
XLOC_011197	XLOC_011197	Bcar3	chr2:226563049-226679512	Control	PAN	OK	25.5793	17.5098	-0.546811	0.684532	-2.32253	0.00015	0.00330926	yes
XLOC_006290	XLOC_006290	Csrp1	chr13:52553748-52575054	Control	PAN	OK	527.707	361.366	-0.546277	0.684785	-2.23144	0.0001	0.00233161	yes
XLOC_003994	XLOC_003994	-	chr10:16821340-16911247	Control	PAN	OK	30.7209	21.0813	-0.543255	0.686221	-2.44122	0.0001	0.00233161	yes
XLOC_010681	XLOC_010681	Fam172a	chr2:4942801-5547841	Control	PAN	OK	15.7392	10.8039	-0.542808	0.686434	-2.28999	0.00035	0.006883	yes
XLOC_006219	XLOC_006219	-	chr13:34483534-34490937	Control	PAN	OK	16.4903	11.3204	-0.542697	0.686486	-2.07618	0.0032	0.0396601	yes
XLOC_001995	XLOC_001995	Uvrag	chr1:163844802-164101579	Control	PAN	OK	26.5854	18.2536	-0.542451	0.686603	-2.14364	0.0003	0.00606217	yes
XLOC_008597	XLOC_008597	Efnb2	chr16:86630355-86675209	Control	PAN	OK	88.8344	61.1019	-0.539902	0.687818	-1.87154	0.00105	0.0164681	yes
XLOC_003481	XLOC_003481	Taok1	chr10:62511937-62638980	Control	PAN	OK	45.4238	31.2531	-0.539451	0.688033	-1.83134	0.00125	0.0189237	yes
XLOC_007865	XLOC_007865	Loxl2	chr15:51275903-51367587	Control	PAN	OK	207.558	142.918	-0.538324	0.68857	-2.12559	0.0002	0.00422515	yes
XLOC_010446	XLOC_010446	Calr	chr19:25956770-25961666	Control	PAN	OK	881.198	606.872	-0.538074	0.68869	-2.20584	0.00055	0.00976898	yes
XLOC_001351	XLOC_001351	Stx11	chr1:7036112-7066536	Control	PAN	OK	30.8742	21.2701	-0.537576	0.688927	-2.00385	0.00045	0.00844462	yes
XLOC_012469	XLOC_012469	Ascc3	chr20:55253661-55561755	Control	PAN	OK	12.6319	8.70559	-0.537063	0.689172	-2.32534	0.0001	0.00233161	yes
XLOC_015603	XLOC_015603	Fkbp14	chr4:84752229-84768423	Control	PAN	OK	47.6995	32.8988	-0.535939	0.68971	-2.09308	0.0002	0.00422515	yes
XLOC_015282	XLOC_015282	Tnfrsf1a	chr4:157864912-157879574	Control	PAN	OK	23.3062	16.0945	-0.534149	0.690566	-2.11314	0.0002	0.00422515	yes
XLOC_008133	XLOC_008133	-	chr15:44448908-44627993	Control	PAN	OK	21.5987	14.9377	-0.531981	0.691604	-2.35984	0.0001	0.00233161	yes
XLOC_009655	XLOC_009655	Cxxc5	chr18:28626372-28656918	Control	PAN	OK	41.0422	28.3866	-0.5319	0.691643	-2.21709	0.00025	0.00516407	yes
XLOC_020291	XLOC_020291	Aldh1a2	chr8:77639802-77719491	Control	PAN	OK	48.4135	33.5716	-0.528167	0.693435	-2.30422	5e-05	0.00128863	yes
XLOC_008712	XLOC_008712	Sh2d4a	chr16:23084246-23156825	Control	PAN	OK	145.665	101.013	-0.528116	0.69346	-2.46503	0.0001	0.00233161	yes
XLOC_002423	XLOC_002423	Cdc42ep2	chr1:221272349-221281201	Control	PAN	OK	16.4761	11.4474	-0.52536	0.694786	-1.83779	0.0017	0.0240153	yes
XLOC_016435	XLOC_016435	Pik3r3	chr5:135074307-135145629	Control	PAN	OK	32.5411	22.6109	-0.525246	0.694841	-1.81626	0.0013	0.0195112	yes
XLOC_011417	XLOC_011417	Osmr	chr2:56108687-56163449	Control	PAN	OK	13.6091	9.46607	-0.523731	0.695571	-1.9709	0.00055	0.00976898	yes
XLOC_007524	XLOC_007524	Sptbn1	chr14:114517687-114700243	Control	PAN	OK	110.571	77.0314	-0.521456	0.696668	-2.07701	0.00055	0.00976898	yes
XLOC_007501	XLOC_007501	Lgalsl	chr14:105047911-105056143	Control	PAN	OK	22.6952	15.8287	-0.519846	0.697446	-2.20835	5e-05	0.00128863	yes
XLOC_009873	XLOC_009873	Epb41l4a	chr18:26569907-26789175	Control	PAN	OK	13.7088	9.59298	-0.515054	0.699767	-1.82889	0.0014	0.0207441	yes
XLOC_014879	XLOC_014879	Flnc	chr4:56711085-56738779	Control	PAN	OK	34.5203	24.2016	-0.512346	0.701081	-2.22823	0.00025	0.00516407	yes
XLOC_018030	XLOC_018030	Rasgrp3	chr6:21072449-21136590	Control	PAN	OK	93.489	65.5632	-0.51191	0.701293	-2.18712	0.00015	0.00330926	yes
XLOC_002194	XLOC_002194	Cdr2	chr1:190889697-190914606	Control	PAN	OK	28.2129	19.7866	-0.511834	0.70133	-2.33687	0.0002	0.00422515	yes
XLOC_013831	XLOC_013831	Dpp4	chr3:48290112-48382022	Control	PAN	OK	86.2431	60.5057	-0.511339	0.701571	-2.00891	0.00025	0.00516407	yes
XLOC_007925	XLOC_007925	Dnajc3	chr15:104186641-104229805	Control	PAN	OK	66.8825	46.9817	-0.50953	0.702451	-1.88645	0.00115	0.0176786	yes
XLOC_005290	XLOC_005290	Ccdc80	chr11:60645659-60682526	Control	PAN	OK	185.229	130.299	-0.507479	0.703451	-2.0608	0.00025	0.00516407	yes
XLOC_021350	XLOC_021350	Vegfa	chr9:17340340-17355680	Control	PAN	OK	18.9309	13.3183	-0.50733	0.703523	-2.02485	0.00045	0.00844462	yes
XLOC_005881	XLOC_005881	Kdelr2	chr12:13192533-13210758	Control	PAN	OK	107.457	75.6249	-0.506824	0.70377	-2.51814	0.0002	0.00422515	yes
XLOC_016915	XLOC_016915	Ptbp3	chr5:76670006-76756197	Control	PAN	OK	73.181	51.52	-0.506336	0.704008	-1.82078	0.0013	0.0195112	yes
XLOC_021590	XLOC_021590	Lrrfip1	chr9:98139505-98267448	Control	PAN	OK	89.4447	63.0791	-0.503834	0.70523	-2.00939	0.0004	0.00766099	yes
XLOC_022392	XLOC_022392	Sh3bgrl	chrX:80213208-80312393	Control	PAN	OK	295.841	208.723	-0.503228	0.705526	-2.16223	0.00025	0.00516407	yes
XLOC_003632	XLOC_003632	Copz2	chr10:84718822-84731879	Control	PAN	OK	50.2545	35.4977	-0.501528	0.706358	-1.9698	0.00075	0.0125237	yes
XLOC_021806	XLOC_021806	Fhl2	chr9:49920599-49963360	Control	PAN	OK	120.944	85.4368	-0.501404	0.706419	-2.17029	0.0001	0.00233161	yes
XLOC_016867	XLOC_016867	-	chr5:60970641-61078553	Control	PAN	OK	46.0666	32.5457	-0.501255	0.706492	-2.23741	0.00035	0.006883	yes
XLOC_015003	XLOC_015003	Tax1bp1	chr4:82776695-82832846	Control	PAN	OK	114.647	81.2413	-0.496917	0.708619	-2.19493	0.0002	0.00422515	yes
XLOC_009884	XLOC_009884	Sil1	chr18:28067482-28301863	Control	PAN	OK	24.5981	17.4896	-0.492052	0.711013	-2.18637	0.0007	0.0118018	yes
XLOC_017710	XLOC_017710	Scfd1	chr6:72124457-72202703	Control	PAN	OK	31.1653	22.167	-0.491528	0.711271	-2.25891	0.0004	0.00766099	yes
XLOC_000780	XLOC_000780	Parva	chr1:177247636-177408269	Control	PAN	OK	128.089	91.1204	-0.491296	0.711386	-2.07605	0.0011	0.0171175	yes
XLOC_009871	XLOC_009871	Stard4	chr18:25982069-25997641	Control	PAN	OK	19.0599	13.5593	-0.491253	0.711407	-1.92691	0.00065	0.0111338	yes
XLOC_006218	XLOC_006218	-	chr13:34365129-34479863	Control	PAN	OK	23.2306	16.5286	-0.491063	0.711501	-2.14718	0.0016	0.0230463	yes
XLOC_015451	XLOC_015451	Asns	chr4:33743279-33761097	Control	PAN	OK	39.4766	28.0963	-0.490618	0.71172	-2.12992	0.0002	0.00422515	yes
XLOC_020175	XLOC_020175	Cadm1	chr8:51858905-52189717	Control	PAN	OK	37.6968	26.8387	-0.49013	0.711961	-2.04442	0.0007	0.0118018	yes
XLOC_005755	XLOC_005755	Tpcn1	chr12:41507783-41566942	Control	PAN	OK	77.3319	55.1664	-0.487275	0.713371	-2.10752	0.0004	0.00766099	yes
XLOC_017764	XLOC_017764	Hif1a	chr6:96810848-96856285	Control	PAN	OK	67.1224	47.9151	-0.486314	0.713847	-2.12904	0.0001	0.00233161	yes
XLOC_011603	XLOC_011603	Fgb	chr2:182028097-182035025	Control	PAN	OK	23.9591	17.1096	-0.485764	0.714119	-1.91977	0.0012	0.0183662	yes
XLOC_010975	XLOC_010975	Fam198b	chr2:178679040-178750054	Control	PAN	OK	138.385	98.827	-0.485713	0.714144	-2.07882	0.00035	0.006883	yes
XLOC_013386	XLOC_013386	Crls1	chr3:125503609-125533411	Control	PAN	OK	11.8373	8.47285	-0.482421	0.715775	-1.76778	0.00425	0.0483737	yes
XLOC_019249	XLOC_019249	Tmem263	chr7:24638207-24668288	Control	PAN	OK	31.9067	22.8441	-0.482039	0.715965	-1.97329	0.0006	0.0104703	yes
XLOC_008371	XLOC_008371	Tnnc1	chr16:7290796-7295414	Control	PAN	OK	131.454	94.3722	-0.478122	0.717912	-1.81125	0.00145	0.0212814	yes
XLOC_003731	XLOC_003731	Mrc2	chr10:93519696-93580474	Control	PAN	OK	65.0435	46.7002	-0.477977	0.717984	-2.08898	0.0003	0.00606217	yes
XLOC_010840	XLOC_010840	Pag1	chr2:94266103-94284547	Control	PAN	OK	11.6749	8.38679	-0.477225	0.718358	-1.77817	0.0028	0.0358169	yes
XLOC_018244	XLOC_018244	Aldh6a1	chr6:108123854-108167185	Control	PAN	OK	10.0725	7.236	-0.477156	0.718392	-1.66611	0.00405	0.0465917	yes
XLOC_019327	XLOC_019327	Lyz2	chr7:60335967-60341264	Control	PAN	OK	74.8133	53.7554	-0.476885	0.718527	-2.29643	0.00065	0.0111338	yes
XLOC_009468	XLOC_009468	Rsu1	chr17:80388476-80577393	Control	PAN	OK	75.6724	54.4764	-0.474135	0.719898	-1.92471	0.0008	0.0132475	yes
XLOC_007032	XLOC_007032	-	chr14:37518354-37756117	Control	PAN	OK	17.044	12.2908	-0.471684	0.721122	-2.09095	0.00015	0.00330926	yes
XLOC_002098	XLOC_002098	Apbb1	chr1:170387614-170411227	Control	PAN	OK	13.7455	9.91527	-0.471232	0.721348	-1.85168	0.00135	0.0200672	yes
XLOC_008760	XLOC_008760	Pcm1	chr16:54040315-54137705	Control	PAN	OK	10.8451	7.84411	-0.467356	0.723289	-1.98493	0.0004	0.00766099	yes
XLOC_001944	XLOC_001944	Arnt2	chr1:146399214-146556143	Control	PAN	OK	15.6402	11.3265	-0.465564	0.724188	-2.00746	0.00055	0.00976898	yes
XLOC_002250	XLOC_002250	Vkorc1	chr1:199338784-199341306	Control	PAN	OK	43.0761	31.2194	-0.464446	0.724749	-2.25206	0.0029	0.036893	yes
XLOC_017792	XLOC_017792	-	chr6:104437105-104532524	Control	PAN	OK	18.1284	13.1486	-0.463341	0.725305	-2.07431	0.0005	0.00914895	yes
XLOC_016785	XLOC_016785	Maged2	chr5:33097653-33507467	Control	PAN	OK	52.0739	37.7811	-0.462896	0.725528	-2.02137	0.00035	0.006883	yes
XLOC_016314	XLOC_016314	Ugcg	chr5:76386837-76419560	Control	PAN	OK	53.9939	39.1856	-0.462474	0.725741	-2.06298	0.00035	0.006883	yes
XLOC_009545	XLOC_009545	-	chr17:43820604-43821608	Control	PAN	OK	99.3296	72.1373	-0.461478	0.726242	-2.40817	0.00055	0.00976898	yes
XLOC_011349	XLOC_011349	Map1b	chr2:29675273-29768750	Control	PAN	OK	43.8871	31.8747	-0.461387	0.726288	-1.94861	0.00065	0.0111338	yes
XLOC_014849	XLOC_014849	Met	chr4:44746886-44855844	Control	PAN	OK	34.7828	25.2658	-0.461187	0.726388	-1.92838	0.00075	0.0125237	yes
XLOC_007774	XLOC_007774	Pck2	chr15:34216734-34224357	Control	PAN	OK	16.3517	11.8799	-0.460915	0.726525	-1.94089	0.00175	0.0244491	yes
XLOC_001069	XLOC_001069	Pla2g16	chr1:222844237-222877191	Control	PAN	OK	162.203	117.977	-0.459294	0.727342	-1.99306	0.00065	0.0111338	yes
XLOC_017180	XLOC_017180	Hmgn2	chr5:152195358-152198813	Control	PAN	OK	52.7962	38.4065	-0.459083	0.727448	-2.24298	0.0007	0.0118018	yes
XLOC_015059	XLOC_015059	Eif2ak3	chr4:98648487-98709695	Control	PAN	OK	14.6635	10.667	-0.459069	0.727456	-1.9558	0.0009	0.0145072	yes
XLOC_017658	XLOC_017658	Pdia6	chr6:42568268-42585654	Control	PAN	OK	212.32	154.488	-0.458749	0.727617	-2.24265	0.0005	0.00914895	yes
XLOC_020876	XLOC_020876	Cgnl1	chr8:78126669-78278475	Control	PAN	OK	27.348	19.9091	-0.458008	0.727991	-2.00272	0.00045	0.00844462	yes
XLOC_021952	XLOC_021952	Hdlbp	chr9:100554406-100624638	Control	PAN	OK	123.734	90.1157	-0.457392	0.728302	-1.90351	0.00065	0.0111338	yes
XLOC_015448	XLOC_015448	-	chr4:31608265-31757062	Control	PAN	OK	41.4192	30.1681	-0.457277	0.72836	-1.94296	0.0009	0.0145072	yes
XLOC_011838	XLOC_011838	Ostc	chr2:235816327-235831651	Control	PAN	OK	178.483	130.028	-0.456967	0.728516	-2.44463	0.00055	0.00976898	yes
XLOC_005029	XLOC_005029	-	chr11:57385875-57484893	Control	PAN	OK	30.0061	21.8669	-0.456503	0.728751	-1.92442	0.00055	0.00976898	yes
XLOC_009412	XLOC_009412	Zeb1	chr17:54656626-54714918	Control	PAN	OK	13.6369	9.94631	-0.455279	0.729369	-1.95424	0.0007	0.0118018	yes
XLOC_010912	XLOC_010912	Jade1	chr2:128461223-128514291	Control	PAN	OK	82.603	60.2545	-0.455125	0.729447	-1.97017	0.00055	0.00976898	yes
XLOC_018144	XLOC_018144	Dnajb9	chr6:64165912-64170180	Control	PAN	OK	26.7343	19.5459	-0.451826	0.731117	-1.8678	0.0011	0.0171175	yes
XLOC_009282	XLOC_009282	Gadd45g	chr17:13391444-13393467	Control	PAN	OK	61.2672	44.802	-0.451553	0.731255	-1.86123	0.00105	0.0164681	yes
XLOC_009980	XLOC_009980	Lman1	chr18:61683390-61707337	Control	PAN	OK	52.8678	38.6677	-0.451261	0.731403	-1.79805	0.0023	0.0306001	yes
XLOC_016396	XLOC_016396	Ssbp3	chr5:126511333-126650190	Control	PAN	OK	43.7518	32.0075	-0.450935	0.731569	-1.88246	0.0009	0.0145072	yes
XLOC_012355	XLOC_012355	Col18a1	chr20:12225201-12332974	Control	PAN	OK	73.8861	54.0921	-0.449887	0.7321	-1.96036	0.0009	0.0145072	yes
XLOC_009713	XLOC_009713	Tnfaip8	chr18:44664283-44779916	Control	PAN	OK	25.5299	18.693	-0.449686	0.732202	-1.73702	0.00295	0.0373586	yes
XLOC_017248	XLOC_017248	Fblim1	chr5:160122462-160156197	Control	PAN	OK	23.0779	16.9036	-0.449179	0.73246	-1.83863	0.00155	0.0224887	yes
XLOC_009826	XLOC_009826	Rock1	chr18:1274784-1390799	Control	PAN	OK	28.5396	20.9063	-0.449028	0.732536	-1.96802	0.00055	0.00976898	yes
XLOC_021436	XLOC_021436	Nck2	chr9:50246743-50373308	Control	PAN	OK	54.8883	40.2307	-0.448199	0.732957	-1.98184	0.00065	0.0111338	yes
XLOC_016417	XLOC_016417	Faf1	chr5:129370540-129738420	Control	PAN	OK	43.9817	32.2485	-0.447671	0.733226	-1.87346	0.00095	0.0151554	yes
XLOC_002528	XLOC_002528	Vps13a	chr1:235352512-235813215	Control	PAN	OK	15.298	11.22	-0.447281	0.733424	-1.98477	0.0005	0.00914895	yes
XLOC_008806	XLOC_008806	Plat	chr16:74098256-74122858	Control	PAN	OK	100.491	73.7554	-0.446247	0.73395	-1.99176	0.00075	0.0125237	yes
XLOC_000616	XLOC_000616	Gab2	chr1:162082889-162283324	Control	PAN	OK	16.4225	12.0698	-0.444271	0.734956	-1.65572	0.00315	0.0391797	yes
XLOC_003319	XLOC_003319	Mprip	chr10:46018407-46133575	Control	PAN	OK	199.838	146.952	-0.443486	0.735356	-1.83042	0.00115	0.0176786	yes
XLOC_017571	XLOC_017571	Plekhh2	chr6:7793847-7895976	Control	PAN	OK	13.0248	9.58179	-0.442898	0.735655	-1.86607	0.00145	0.0212814	yes
XLOC_016989	XLOC_016989	Dock7	chr5:117595986-117780831	Control	PAN	OK	18.5931	13.6841	-0.442263	0.735979	-1.95572	0.00065	0.0111338	yes
XLOC_005275	XLOC_005275	Cd47	chr11:53514590-53575977	Control	PAN	OK	90.8071	66.9462	-0.439803	0.737235	-1.94714	0.00065	0.0111338	yes
XLOC_021577	XLOC_021577	Ugt1a1,Ugt1a2,Ugt1a3,Ugt1a5,Ugt1a6,Ugt1a7c,Ugt1a8,Ugt1a9	chr9:95161156-95302822	Control	PAN	OK	40.9625	30.2194	-0.438828	0.737734	-1.82361	0.0011	0.0171175	yes
XLOC_015326	XLOC_015326	RGD1306151	chr4:168976724-169019570	Control	PAN	OK	12.9681	9.57308	-0.437909	0.738204	-1.81573	0.002	0.027366	yes
XLOC_022264	XLOC_022264	-	chrX:21472203-21555634	Control	PAN	OK	20.1917	14.9058	-0.437885	0.738216	-1.92952	0.00095	0.0151554	yes
XLOC_010582	XLOC_010582	RGD1559896	chr19:57396603-57422093	Control	PAN	OK	78.0625	57.6378	-0.437614	0.738355	-1.90272	0.00085	0.013894	yes
XLOC_005821	XLOC_005821	Stard13	chr12:1023495-1237741	Control	PAN	OK	12.0277	8.88278	-0.437283	0.738524	-1.85403	0.00165	0.0235475	yes
XLOC_011386	XLOC_011386	-	chr2:38977970-39143292	Control	PAN	OK	11.3061	8.35117	-0.437049	0.738644	-1.79164	0.00335	0.0410449	yes
XLOC_000209	XLOC_000209	Peg3	chr1:70210810-70237457	Control	PAN	OK	26.7622	19.7706	-0.436842	0.73875	-1.69788	0.00375	0.0442729	yes
XLOC_008509	XLOC_008509	Dlc1	chr16:59197314-59248774	Control	PAN	OK	67.5065	49.9164	-0.435514	0.73943	-1.79862	0.0014	0.0207441	yes
XLOC_001682	XLOC_001682	Rps16	chr1:85405498-85408444	Control	PAN	OK	605.134	447.603	-0.435034	0.739676	-2.40283	0.0005	0.00914895	yes
XLOC_007152	XLOC_007152	Xbp1	chr14:85753735-85758820	Control	PAN	OK	88.9824	65.8262	-0.434859	0.739766	-1.94786	0.0006	0.0104703	yes
XLOC_022452	XLOC_022452	Tmem164	chrX:113947362-114110062	Control	PAN	OK	18.6234	13.7843	-0.434094	0.740158	-1.87626	0.00085	0.013894	yes
XLOC_006260	XLOC_006260	Nuak2	chr13:49092305-49109052	Control	PAN	OK	113.82	84.33	-0.432642	0.740904	-1.81428	0.00135	0.0200672	yes
XLOC_019044	XLOC_019044	Krt18	chr7:143629410-143633138	Control	PAN	OK	102.351	75.8926	-0.43149	0.741496	-1.67214	0.00315	0.0391797	yes
XLOC_005230	XLOC_005230	Rcan1	chr11:32539687-32620308	Control	PAN	OK	16.3763	12.1579	-0.42971	0.742411	-1.69052	0.0027	0.0348253	yes
XLOC_019420	XLOC_019420	Zhx1	chr7:97915579-97944756	Control	PAN	OK	10.8413	8.04868	-0.429709	0.742412	-1.75809	0.0022	0.0296087	yes
XLOC_011579	XLOC_011579	B3galnt1	chr2:166226741-166256005	Control	PAN	OK	37.7562	28.0347	-0.429499	0.74252	-1.82936	0.0013	0.0195112	yes
XLOC_015667	XLOC_015667	Mthfd2	chr4:115004440-115015965	Control	PAN	OK	26.9539	20.0261	-0.428608	0.742978	-1.80971	0.0019	0.0261259	yes
XLOC_007260	XLOC_007260	-	chr14:14125825-14159774	Control	PAN	OK	18.9761	14.107	-0.427778	0.743406	-1.90006	0.001	0.0158263	yes
XLOC_010254	XLOC_010254	Cdh1	chr19:38768466-38838395	Control	PAN	OK	17.3555	12.9036	-0.427623	0.743486	-1.75003	0.0036	0.0429015	yes
XLOC_019571	XLOC_019571	Arfgap3	chr7:124149663-124213146	Control	PAN	OK	25.4341	18.919	-0.426928	0.743844	-1.76002	0.00405	0.0465917	yes
XLOC_006189	XLOC_006189	-	chr12:46862916-46863343	Control	PAN	OK	158.902	118.469	-0.423634	0.745544	-2.86028	0.0027	0.0348253	yes
XLOC_018820	XLOC_018820	Mal2	chr7:94130851-94163649	Control	PAN	OK	29.0453	21.6636	-0.423032	0.745855	-1.93796	0.00165	0.0235475	yes
XLOC_006542	XLOC_006542	Mcm6	chr13:45042881-45068073	Control	PAN	OK	11.6966	8.7241	-0.423017	0.745863	-1.76332	0.00405	0.0465917	yes
XLOC_021035	XLOC_021035	Tgfbr2	chr8:124310224-124399452	Control	PAN	OK	52.2091	38.9483	-0.422742	0.746005	-1.68857	0.00345	0.0417927	yes
XLOC_021817	XLOC_021817	Stat1	chr9:54287497-54328033	Control	PAN	OK	26.9971	20.142	-0.422596	0.746081	-1.77348	0.0023	0.0306001	yes
XLOC_022491	XLOC_022491	Stag2	chrX:128493613-128624434	Control	PAN	OK	20.9826	15.6659	-0.421559	0.746617	-1.70088	0.0034	0.0413306	yes
XLOC_022652	XLOC_022652	Rai2	chrX:34731890-34794612	Control	PAN	OK	17.1853	12.8322	-0.421407	0.746696	-1.70924	0.00275	0.0353069	yes
XLOC_010854	XLOC_010854	Hltf	chr2:104854571-104914593	Control	PAN	OK	11.7606	8.782	-0.421343	0.746729	-1.75504	0.0025	0.0328534	yes
XLOC_017755	XLOC_017755	Daam1	chr6:94611206-94739203	Control	PAN	OK	21.9097	16.3687	-0.420633	0.747097	-1.84891	0.00115	0.0176786	yes
XLOC_014050	XLOC_014050	Ptprj	chr3:79233388-79391084	Control	PAN	OK	19.1092	14.3103	-0.417209	0.748872	-1.72033	0.0035	0.042215	yes
XLOC_008725	XLOC_008725	Sh3rf1	chr16:32062217-32228043	Control	PAN	OK	17.5183	13.1403	-0.414863	0.750091	-1.71432	0.00255	0.0333221	yes
XLOC_013344	XLOC_013344	Stard7	chr3:119698468-119727381	Control	PAN	OK	27.728	20.8353	-0.412318	0.751415	-1.73259	0.0023	0.0306001	yes
XLOC_020721	XLOC_020721	Arhgef12	chr8:47255646-47393996	Control	PAN	OK	57.293	43.1177	-0.410078	0.752583	-1.69104	0.0027	0.0348253	yes
XLOC_016466	XLOC_016466	P3h1	chr5:138279511-138294432	Control	PAN	OK	48.884	36.7919	-0.409976	0.752636	-1.7916	0.00165	0.0235475	yes
XLOC_020970	XLOC_020970	Atp2c1	chr8:113748287-114039971	Control	PAN	OK	66.5226	50.161	-0.407278	0.754045	-1.7205	0.00245	0.0323182	yes
XLOC_011334	XLOC_011334	Arhgef28	chr2:25738513-26011429	Control	PAN	OK	30.5882	23.0667	-0.407167	0.754103	-1.74867	0.00315	0.0391797	yes
XLOC_012385	XLOC_012385	Arid5b	chr20:21564672-21884949	Control	PAN	OK	16.0448	12.108	-0.406148	0.754636	-1.6741	0.0032	0.0396601	yes
XLOC_022450	XLOC_022450	-	chrX:112769224-112983887	Control	PAN	OK	73.1	55.2116	-0.404901	0.755288	-1.73208	0.0031	0.0387653	yes
XLOC_001481	XLOC_001481	Lnpep	chr1:59289389-59384550	Control	PAN	OK	30.7473	23.2491	-0.403281	0.756137	-1.74465	0.0022	0.0296087	yes
XLOC_018995	XLOC_018995	Ano6	chr7:137141828-137335208	Control	PAN	OK	34.4462	26.1208	-0.399146	0.758307	-1.7947	0.00215	0.0291043	yes
XLOC_016299	XLOC_016299	Slc44a1	chr5:70245842-70424115	Control	PAN	OK	21.8238	16.5574	-0.398424	0.758687	-1.70023	0.00265	0.0343711	yes
XLOC_000883	XLOC_000883	Htra1	chr1:201499066-201548513	Control	PAN	OK	284.427	216.113	-0.396268	0.759821	-1.61626	0.004	0.0462454	yes
XLOC_021917	XLOC_021917	Trip12	chr9:92305056-92500756	Control	PAN	OK	45.4609	34.5699	-0.39511	0.760431	-1.71269	0.0034	0.0413306	yes
XLOC_012984	XLOC_012984	Nek6	chr3:22811926-22888598	Control	PAN	OK	39.3781	29.9525	-0.394718	0.760638	-1.71103	0.0021	0.0285105	yes
XLOC_002162	XLOC_002162	Rras2	chr1:178940514-179010257	Control	PAN	OK	149.133	113.727	-0.391021	0.76259	-1.71281	0.0028	0.0358169	yes
XLOC_021403	XLOC_021403	Hs6st1	chr9:42619591-42659227	Control	PAN	OK	42.1009	32.1492	-0.389068	0.763623	-1.70175	0.0033	0.0405749	yes
XLOC_000537	XLOC_000537	Vimp	chr1:126979578-126989344	Control	PAN	OK	100.062	76.4501	-0.388305	0.764027	-2.00364	0.00255	0.0333221	yes
XLOC_010967	XLOC_010967	Ppm1l	chr2:165929330-166218774	Control	PAN	OK	25.4518	19.448	-0.388144	0.764112	-1.7109	0.0024	0.0318697	yes
XLOC_007059	XLOC_007059	Rell1	chr14:45982233-46041885	Control	PAN	OK	31.9523	24.4437	-0.386454	0.765008	-1.65704	0.00305	0.0382429	yes
XLOC_013072	XLOC_013072	Ssfa2	chr3:66593774-66631142	Control	PAN	OK	55.841	42.7417	-0.385682	0.765417	-1.69949	0.0033	0.0405749	yes
XLOC_007344	XLOC_007344	-	chr14:38475816-38533351	Control	PAN	OK	19.1151	14.6804	-0.380821	0.768	-1.72139	0.00355	0.0426704	yes
XLOC_009277	XLOC_009277	Cplx2	chr17:10739084-10830246	Control	PAN	OK	20.9994	16.1388	-0.379821	0.768533	-1.70908	0.0036	0.0429015	yes
XLOC_020825	XLOC_020825	Arih1	chr8:64165179-64269948	Control	PAN	OK	28.0246	21.6153	-0.374642	0.771297	-1.66998	0.0032	0.0396601	yes
XLOC_018033	XLOC_018033	Birc6	chr6:21900691-22092539	Control	PAN	OK	22.4172	16.7679	-0.373331	0.771998	-1.84573	0.0039	0.0454663	yes
