# Supplementary material for: The Role of miR-217-5p in the Puromycin Aminonucleoside-Induced Morphological Change of Podocytes
Source: Noncoding RNA. 2022 Jun 8;8(3):43. doi: 10.3390/ncrna8030043 (PMC9229466; doi:10.3390/ncrna8030043)
Supplement: Supplementary file 1 [file ncrna-08-00043-s001.zip › Table_S6_MinRevise.xlsx]

## Sheet: Upregulated mRNA
Table S6. Pathways significantly associated with the mRNAs upregulated by PAN in podocytes.
Category	Term	Count	%	PValue	Genes	List Total	Pop Hits	Pop Total	Fold Enrichment	Bonferroni	Benjamini	FDR
KEGG_PATHWAY	rno04115:p53 signaling pathway	7	3.5	0.000151639	CDKN1A, CCND1, CCNG2, CASP3, CCNG1, BID, GTSE1	100	73	8901	8.53521	0.032666	0.033209	0.0326024
KEGG_PATHWAY	rno04360:Axon guidance	9	4.5	0.000886607	PARD6B, SEMA7A, SEMA3D, PARD6G, PIK3CD, RHOD, GNAI1, RND1, EPHA2	100	181	8901	4.42591	0.176551	0.0970835	0.0953103
KEGG_PATHWAY	rno00330:Arginine and proline metabolism	5	2.5	0.00241113	ALDH4A1, ARG1, AMD1, SAT1, ALDH9A1	100	51	8901	8.72647	0.410615	0.176013	0.172798
KEGG_PATHWAY	rno05146:Amoebiasis	6	3	0.00423018	ARG1, CASP3, HSPB1, PIK3CD, CD14, TLR4	100	96	8901	5.56312	0.604804	0.231602	0.227372
KEGG_PATHWAY	rno05132:Salmonella infection	9	4.5	0.00720229	CYTH2, JUN, RIPK3, FHOD1, CASP3, PIK3CD, CD14, TLR4, ARL8A	100	254	8901	3.1539	0.794644	0.272901	0.267917
KEGG_PATHWAY	rno04390:Hippo signaling pathway	7	3.5	0.00821336	PARD6B, CCND1, PPP2R2C, DLG4, ID1, PARD6G, TEAD2	100	158	8901	3.94348	0.835715	0.272901	0.267917
KEGG_PATHWAY	rno05133:Pertussis	5	2.5	0.00872287	JUN, CASP3, CD14, TLR4, GNAI1	100	73	8901	6.09658	0.853201	0.272901	0.267917
KEGG_PATHWAY	rno01524:Platinum drug resistance	5	2.5	0.0135417	CDKN1A, SLC31A1, CASP3, PIK3CD, BID	100	83	8901	5.36205	0.949505	0.370703	0.363932
KEGG_PATHWAY	rno05210:Colorectal cancer	5	2.5	0.0171115	CDKN1A, JUN, CCND1, CASP3, PIK3CD	100	89	8901	5.00056	0.977174	0.37948	0.372549
KEGG_PATHWAY	rno05222:Small cell lung cancer	5	2.5	0.0190974	CDKN1A, TRAF4, CCND1, CASP3, PIK3CD	100	92	8901	4.8375	0.985342	0.37948	0.372549
KEGG_PATHWAY	rno01522:Endocrine resistance	5	2.5	0.0204975	CDKN1A, JUN, CCND1, SHC1, PIK3CD	100	94	8901	4.73457	0.98928	0.37948	0.372549
KEGG_PATHWAY	rno05162:Measles	6	3	0.0219789	JUN, CCND1, CASP3, PIK3CD, BID, TLR4	100	144	8901	3.70875	0.992304	0.37948	0.372549
KEGG_PATHWAY	rno04650:Natural killer cell mediated cytotoxicity	5	2.5	0.0242695	SHC1, CASP3, RAET1L, PIK3CD, BID	100	99	8901	4.49545	0.995395	0.37948	0.372549
KEGG_PATHWAY	rno05205:Proteoglycans in cancer	7	3.5	0.0276174	CDKN1A, CCND1, CASP3, CAV1, PLAUR, PIK3CD, TLR4	100	207	8901	3.01	0.997831	0.37948	0.372549
KEGG_PATHWAY	rno05142:Chagas disease	5	2.5	0.0284365	JUN, PPP2R2C, PIK3CD, TLR4, GNAI1	100	104	8901	4.27933	0.998196	0.37948	0.372549
KEGG_PATHWAY	rno05161:Hepatitis B	6	3	0.0304631	CDKN1A, JUN, CASP3, PIK3CD, BID, TLR4	100	157	8901	3.40166	0.998858	0.37948	0.372549
KEGG_PATHWAY	rno04015:Rap1 signaling pathway	7	3.5	0.03117	PARD6B, ID1, PARD6G, PIK3CD, GNAI1, BCAR1, EPHA2	100	213	8901	2.92521	0.999027	0.37948	0.372549
KEGG_PATHWAY	rno05160:Hepatitis C	6	3	0.0311902	CDKN1A, CCND1, PPP2R2C, CASP3, PIK3CD, BID	100	158	8901	3.38013	0.999031	0.37948	0.372549
KEGG_PATHWAY	rno04668:TNF signaling pathway	5	2.5	0.0349465	JUN, RIPK3, CASP3, PIK3CD, JUNB	100	111	8901	4.00946	0.999586	0.402805	0.395448
KEGG_PATHWAY	rno05221:Acute myeloid leukemia	4	2	0.0397763	CCND1, PIK3CD, CD14, DUSP6	100	68	8901	5.23588	0.999862	0.418032	0.410397
KEGG_PATHWAY	rno04935:Growth hormone synthesis, secretion and action	5	2.5	0.0400853	SHC1, PIK3CD, JUNB, GNAI1, BCAR1	100	116	8901	3.83664	0.999871	0.418032	0.410397
KEGG_PATHWAY	rno05206:MicroRNAs in cancer	8	4	0.0437414	CDKN1A, MARCKS, CCND1, SHC1, CASP3, CCNG1, FSCN1, PIK3CD	100	292	8901	2.43863	0.999944	0.422931	0.415206
KEGG_PATHWAY	rno04010:MAPK signaling pathway	8	4	0.0444174	DUSP4, JUN, CASP3, MKNK2, HSPB1, CD14, DUSP6, EPHA2	100	293	8901	2.43031	0.999952	0.422931	0.415206
KEGG_PATHWAY	rno05214:Glioma	4	2	0.049082	CDKN1A, CCND1, SHC1, PIK3CD	100	74	8901	4.81135	0.999984	0.43063	0.422765
KEGG_PATHWAY	rno04071:Sphingolipid signaling pathway	5	2.5	0.0491587	PPP2R2C, PIK3CD, S1PR3, BID, GNAI1	100	124	8901	3.58911	0.999984	0.43063	0.422765
KEGG_PATHWAY	rno05100:Bacterial invasion of epithelial cells	4	2	0.0540999	SHC1, CAV1, PIK3CD, BCAR1	100	77	8901	4.6239	0.999995	0.449849	0.441633
KEGG_PATHWAY	rno05220:Chronic myeloid leukemia	4	2	0.0558255	CDKN1A, CCND1, SHC1, PIK3CD	100	78	8901	4.56462	0.999997	0.449849	0.441633
KEGG_PATHWAY	rno05163:Human cytomegalovirus infection	7	3.5	0.0578208	CDKN1A, CCND1, CASP3, PIK3CD, BID, GNAI1, BCAR1	100	248	8901	2.51238	0.999998	0.449849	0.441633
KEGG_PATHWAY	rno04068:FoxO signaling pathway	5	2.5	0.0619668	CDKN1A, CCND1, CCNG2, PIK3CD, SGK1	100	134	8901	3.32127	0.999999	0.449849	0.441633
KEGG_PATHWAY	rno04936:Alcoholic liver disease	5	2.5	0.0633362	CCND1, CASP3, CD14, TLR4, ALDH9A1	100	135	8901	3.29667	0.999999	0.449849	0.441633
KEGG_PATHWAY	rno05202:Transcriptional misregulation in cancer	6	3	0.0636772	CDK9, CDKN1A, MLLT1, CD14, ETV4, DUSP6	100	193	8901	2.76715	0.999999	0.449849	0.441633
KEGG_PATHWAY	rno05416:Viral myocarditis	4	2	0.0686247	CCND1, CASP3, CAV1, BID	100	85	8901	4.18871	1	0.455418	0.4471
KEGG_PATHWAY	rno04012:ErbB signaling pathway	4	2	0.0686247	CDKN1A, JUN, SHC1, PIK3CD	100	85	8901	4.18871	1	0.455418	0.4471
KEGG_PATHWAY	rno04510:Focal adhesion	6	3	0.0718426	JUN, CCND1, SHC1, CAV1, PIK3CD, BCAR1	100	200	8901	2.6703	1	0.462751	0.454299
KEGG_PATHWAY	rno05224:Breast cancer	5	2.5	0.0825691	CDKN1A, JUN, CCND1, SHC1, PIK3CD	100	148	8901	3.00709	1	0.475299	0.466617
KEGG_PATHWAY	rno05417:Lipid and atherosclerosis	6	3	0.0831505	JUN, CASP3, PIK3CD, CD14, BID, TLR4	100	209	8901	2.55531	1	0.475299	0.466617
KEGG_PATHWAY	rno04144:Endocytosis	7	3.5	0.08446	CYTH2, PARD6B, RAB31, CAV1, CHMP4C, PARD6G, FOLR1	100	274	8901	2.27398	1	0.475299	0.466617
KEGG_PATHWAY	rno04620:Toll-like receptor signaling pathway	4	2	0.0847256	JUN, PIK3CD, CD14, TLR4	100	93	8901	3.82839	1	0.475299	0.466617
KEGG_PATHWAY	rno04350:TGF-beta signaling pathway	4	2	0.086843	TGIF1, ID1, INHBA, NBL1	100	94	8901	3.78766	1	0.475299	0.466617
KEGG_PATHWAY	rno05226:Gastric cancer	5	2.5	0.0873758	CDKN1A, CCND1, TERC, SHC1, PIK3CD	100	151	8901	2.94735	1	0.475299	0.466617
KEGG_PATHWAY	rno04666:Fc gamma R-mediated phagocytosis	4	2	0.0889828	MARCKSL1, MARCKS, INPPL1, PIK3CD	100	95	8901	3.74779	1	0.475299	0.466617
KEGG_PATHWAY	rno05167:Kaposi sarcoma-associated herpesvirus infection	6	3	0.0925646	CDKN1A, JUN, CCND1, CASP3, PIK3CD, BID	100	216	8901	2.4725	1	0.482658	0.473842
KEGG_PATHWAY	rno05030:Cocaine addiction	3	1.5	0.095943	JUN, DLG4, GNAI1	100	47	8901	5.68149	1	0.48639	0.477506
KEGG_PATHWAY	rno05165:Human papillomavirus infection	8	4	0.0977221	HES6, CDKN1A, PARD6B, CCND1, PPP2R2C, CASP3, PARD6G, PIK3CD	100	353	8901	2.01722	1	0.48639	0.477506
