# Supplementary material for: The Role of miR-217-5p in the Puromycin Aminonucleoside-Induced Morphological Change of Podocytes
Source: Noncoding RNA. 2022 Jun 8;8(3):43. doi: 10.3390/ncrna8030043 (PMC9229466; doi:10.3390/ncrna8030043)
Supplement: Supplementary file 1 [file ncrna-08-00043-s001.zip › Table_S7_MinRevise.xlsx]

## Sheet: Downregulated mRNA
Table S7. Pathways significantly associated with the mRNAs downregulated by PAN in podocytes.
Category	Term	Count	%	PValue	Genes	List Total	Pop Hits	Pop Total	Fold Enrichment	Bonferroni	Benjamini	FDR
KEGG_PATHWAY	rno05205:Proteoglycans in cancer	24	5.89681	1.07e-09	TGFB2, CAMK2D, ARHGEF12, PPP1R12A, SDC4, ROCK1, ITGB5, ROCK2, SDC2, ITGB3, FN1, RRAS2, MSN, PIK3R3, PRKCA, HIF1A, EGFR, VEGFA, IGF1R, PLAU, PLCE1, FLNB, FLNC, MET	219	207	8901	4.71233	2.82e-07	2.82e-07	2.22e-07
KEGG_PATHWAY	rno04510:Focal adhesion	23	5.65111	3.06e-09	PPP1R12A, ROCK1, ITGB5, ROCK2, ACTN1, ITGB3, TNC, FN1, PIK3R3, PRKCA, PARVA, ACTN4, EGFR, VEGFA, IGF1R, MYLK, COL4A1, FLNB, FYN, FLNC, MET, DOCK1, VCL	219	200	8901	4.67404	8.04e-07	4.02e-07	3.17e-07
KEGG_PATHWAY	rno04520:Adherens junction	14	3.4398	1.58e-08	ACTN1, PTPRM, PTPRJ, ACTN4, EGFR, TGFBR2, IGF1R, TJP1, CDH1, PARD3, CTNNA1, FYN, MET, VCL	219	72	8901	7.90297	4.16e-06	1.39e-06	1.09e-06
KEGG_PATHWAY	rno04360:Axon guidance	20	4.914	8.22e-08	ROBO2, SEMA5A, NRP1, EPHA7, CAMK2D, ARHGEF12, ROCK1, ROCK2, NTN4, PIK3R3, PRKCA, BMP7, EFNB2, CXCL12, PARD3, NCK2, FYN, SRGAP2, MET, SRGAP1	219	181	8901	4.49103	2.16e-05	5.41e-06	4.26e-06
KEGG_PATHWAY	rno04933:AGE-RAGE signaling pathway in diabetic complications	14	3.4398	9.72e-07	TGFB2, STAT1, TGFB3, SERPINE1, FN1, PIK3R3, PRKCA, F3, NFKB1, VEGFA, TGFBR2, COL4A1, CCL2, PLCE1	219	101	8901	5.6338	0.000256	5.11e-05	4.02e-05
KEGG_PATHWAY	rno00040:Pentose and glucuronate interconversions	9	2.2113	1.19e-06	UGT1A1, RPE, UGT1A5, UGT1A3, UGT1A2, UGT1A9, UGT1A8, UGT1A7C, UGT1A6	219	34	8901	10.7587	0.000314	5.23e-05	4.12e-05
KEGG_PATHWAY	rno04810:Regulation of actin cytoskeleton	20	4.914	2.11e-06	ARHGEF12, PPP1R12A, ROCK1, ITGB5, ROCK2, ACTN1, ITGB3, FN1, RRAS2, MSN, PIK3R3, ACTN4, EGFR, MYLK, CXCL12, MYH9, MYH11, MYH10, DOCK1, VCL	219	223	8901	3.64519	0.000555	7.93e-05	6.24e-05
KEGG_PATHWAY	rno00053:Ascorbate and aldarate metabolism	8	1.9656	6.05e-06	UGT1A1, UGT1A5, UGT1A3, UGT1A2, UGT1A9, UGT1A8, UGT1A7C, UGT1A6	219	30	8901	10.8384	0.00158957	0.000199	0.000157
KEGG_PATHWAY	rno00860:Porphyrin metabolism	9	2.2113	7.89e-06	UGT1A1, UGT1A5, UGT1A3, UGT1A2, UGT1A9, CP, UGT1A8, UGT1A7C, UGT1A6	219	43	8901	8.50685	0.00207259	0.000231	0.000181
KEGG_PATHWAY	rno05202:Transcriptional misregulation in cancer	17	4.1769	1.95e-05	ARNT2, PBX3, PLAT, NFKB1, PBX1, TGFBR2, IGF1R, GADD45G, FUT8, MEIS1, ZEB1, PAX8, PLAU, WT1, HIST2H3C2, CDK14, MET	219	193	8901	3.58003	0.00510612	0.000512	0.000403
KEGG_PATHWAY	rno04380:Osteoclast differentiation	13	3.1941	3.84e-05	TGFB2, CSF1, STAT1, ITGB3, FHL2, PIK3R3, TNFRSF11B, GAB2, NFKB1, TGFBR2, TNFRSF1A, SIRPA, FYN	219	121	8901	4.36669	0.0100543	0.000919	0.000723
KEGG_PATHWAY	rno05212:Pancreatic cancer	10	2.457	8.3e-05	TGFB2, CDK6, STAT1, TGFB3, PIK3R3, EGFR, NFKB1, TGFBR2, VEGFA, GADD45G	219	75	8901	5.41918	0.0215936	0.00181911	0.00143177
KEGG_PATHWAY	rno04010:MAPK signaling pathway	20	4.914	0.0001	TGFB2, MAP3K1, CSF1, TGFB3, RRAS2, PRKCA, EGFR, NFKB1, VEGFA, TGFBR2, IGF1R, RASGRP3, TNFRSF1A, GADD45G, RPS6KA3, TAOK1, FLNB, FLNC, MET, MAP4K3	219	293	8901	2.77432	0.0260025	0.00202655	0.00159504
KEGG_PATHWAY	rno05146:Amoebiasis	11	2.7027	0.000113	TGFB2, TGFB3, COL4A1, ACTN1, FN1, PIK3R3, PRKCA, ADCY1, ACTN4, NFKB1, VCL	219	96	8901	4.65711	0.0293551	0.00207543	0.00163352
KEGG_PATHWAY	rno05200:Pathways in cancer	29	7.12531	0.000118	CAMK2D, ROCK1, ROCK2, PIK3R3, ADCY1, HIF1A, EGFR, RASGRP3, HSP90B1, IGF1R, CDH1, CTNNA1, ARNT2, TGFB2, ARHGEF12, STAT1, TGFB3, FN1, PRKCA, NFKB1, VEGFA, TGFBR2, GADD45G, CXCL12, CDK6, PAX8, COL4A1, CKS2, MET	219	538	8901	2.19084	0.0306537	0.00207543	0.00163352
KEGG_PATHWAY	rno05207:Chemical carcinogenesis - receptor activation	17	4.1769	0.000145	UGT1A1, PIK3R3, PRKCA, ADCY1, EGFR, NFKB1, UGT1A7C, VEGFA, HSP90B1, RPS6KA3, CREB3L2, UGT1A5, UGT1A3, UGT1A2, UGT1A9, UGT1A8, UGT1A6	219	228	8901	3.03046	0.0375094	0.00229876	0.00180929
KEGG_PATHWAY	rno04270:Vascular smooth muscle contraction	13	3.1941	0.000149	ARHGEF12, PPP1R12A, ROCK1, ROCK2, PRKCA, ADCY1, MYLK, ACTA2, CALD1, MYH9, MYH11, MYH10, PRKG1	219	139	8901	3.80122	0.038328	0.00229876	0.00180929
KEGG_PATHWAY	rno04530:Tight junction	14	3.4398	0.000224	MAP3K1, ROCK1, ROCK2, ACTN1, MSN, ACTN4, TJP1, NEDD4, PARD3, MYH9, MYH11, SYNPO, MYH10, CGNL1	219	167	8901	3.40727	0.0572529	0.00327503	0.00257769
KEGG_PATHWAY	rno00830:Retinol metabolism	10	2.457	0.000241	UGT1A1, ALDH1A2, UGT1A5, UGT1A3, UGT1A2, UGT1A9, UGT1A8, UGT1A7C, DHRS3, UGT1A6	219	86	8901	4.72603	0.0613756	0.00333328	0.00262353
KEGG_PATHWAY	rno00983:Drug metabolism - other enzymes	10	2.457	0.00055	RRM1, RRM2, UGT1A1, UGT1A5, UGT1A3, UGT1A2, UGT1A9, UGT1A8, UGT1A7C, UGT1A6	219	96	8901	4.23373	0.134646	0.00722887	0.00568964
KEGG_PATHWAY	rno04141:Protein processing in endoplasmic reticulum	13	3.1941	0.000845	XBP1, HSPA5, EIF2AK3, PDIA6, HSP90B1, HERPUD1, PDIA4, DNAJC3, LMAN1, MAN1A1, CALR, SEC24D, SIL1	219	168	8901	3.14506	0.199409	0.0105862	0.00833212
KEGG_PATHWAY	rno05142:Chagas disease	10	2.457	0.000984	TGFB2, TGFB3, SERPINE1, CCL2, PIK3R3, ADCY1, CALR, NFKB1, TGFBR2, TNFRSF1A	219	104	8901	3.90806	0.228151	0.011696	0.00920557
KEGG_PATHWAY	rno04611:Platelet activation	11	2.7027	0.00102284	FGB, ARHGEF12, PPP1R12A, ROCK1, ROCK2, ITGB3, PIK3R3, FYN, ADCY1, PRKG1, MYLK	219	126	8901	3.54827	0.235967	0.011696	0.00920557
KEGG_PATHWAY	rno05163:Human cytomegalovirus infection	16	3.9312	0.00111894	ARHGEF12, ROCK1, ROCK2, ITGB3, PIK3R3, PRKCA, ADCY1, EGFR, NFKB1, VEGFA, TNFRSF1A, CXCL12, CDK6, CREB3L2, CCL2, CALR	219	248	8901	2.62218	0.255056	0.0122617	0.00965085
KEGG_PATHWAY	rno01240:Biosynthesis of cofactors	12	2.9484	0.00138268	VKORC1, GMPPB, UGT1A1, MTHFD2, UGT1A5, UGT1A3, UGT1A2, UGT1A9, UGT1A8, UGT1A7C, DHRS3, UGT1A6	219	154	8901	3.16705	0.305036	0.0145457	0.0114486
KEGG_PATHWAY	rno04918:Thyroid hormone synthesis	8	1.9656	0.0019858	HSPA5, PAX8, CREB3L2, PRKCA, LRP2, ADCY1, PDIA4, HSP90B1	219	73	8901	4.45412	0.407133	0.0193432	0.0152245
KEGG_PATHWAY	rno00982:Drug metabolism - cytochrome P450	8	1.9656	0.0019858	UGT1A1, UGT1A5, UGT1A3, UGT1A2, UGT1A9, UGT1A8, UGT1A7C, UGT1A6	219	73	8901	4.45412	0.407133	0.0193432	0.0152245
KEGG_PATHWAY	rno04976:Bile secretion	9	2.2113	0.00208009	UGT1A1, UGT1A5, UGT1A3, ADCY1, UGT1A2, UGT1A9, UGT1A8, UGT1A7C, UGT1A6	219	94	8901	3.89143	0.421683	0.019538	0.0153778
KEGG_PATHWAY	rno04015:Rap1 signaling pathway	14	3.4398	0.00219601	CSF1, ITGB3, PIK3R3, PRKCA, ADCY1, EGFR, VEGFA, IGF1R, RASGRP3, CDH1, PARD3, PLCE1, PRKD1, MET	219	213	8901	2.67143	0.439084	0.0197327	0.015531
KEGG_PATHWAY	rno04670:Leukocyte transendothelial migration	10	2.457	0.00225088	CXCL12, ROCK1, ROCK2, ACTN1, CTNNA1, MSN, PIK3R3, PRKCA, ACTN4, VCL	219	117	8901	3.47383	0.447138	0.0197327	0.015531
KEGG_PATHWAY	rno05204:Chemical carcinogenesis - DNA adducts	8	1.9656	0.00250501	UGT1A1, UGT1A5, UGT1A3, UGT1A2, UGT1A9, UGT1A8, UGT1A7C, UGT1A6	219	76	8901	4.2783	0.482965	0.020588	0.0162043
KEGG_PATHWAY	rno00980:Metabolism of xenobiotics by cytochrome P450	8	1.9656	0.00250501	UGT1A1, UGT1A5, UGT1A3, UGT1A2, UGT1A9, UGT1A8, UGT1A7C, UGT1A6	219	76	8901	4.2783	0.482965	0.020588	0.0162043
KEGG_PATHWAY	rno05100:Bacterial invasion of epithelial cells	8	1.9656	0.00269945	CDH1, CTNNA1, FN1, PIK3R3, MET, DOCK1, VCL, CD2AP	219	77	8901	4.22274	0.508806	0.0215138	0.0169329
KEGG_PATHWAY	rno05215:Prostate cancer	9	2.2113	0.00288312	ZEB1, PLAU, CREB3L2, PIK3R3, PLAT, EGFR, NFKB1, IGF1R, HSP90B1	219	99	8901	3.69489	0.532032	0.0218311	0.0171826
KEGG_PATHWAY	rno05220:Chronic myeloid leukemia	8	1.9656	0.00290528	TGFB2, CDK6, TGFB3, PIK3R3, GAB2, NFKB1, TGFBR2, GADD45G	219	78	8901	4.1686	0.534759	0.0218311	0.0171826
KEGG_PATHWAY	rno00140:Steroid hormone biosynthesis	8	1.9656	0.0041205	UGT1A1, UGT1A5, UGT1A3, UGT1A2, UGT1A9, UGT1A8, UGT1A7C, UGT1A6	219	83	8901	3.91748	0.662412	0.0293222	0.0230787
KEGG_PATHWAY	rno04926:Relaxin signaling pathway	10	2.457	0.00412518	ACTA2, COL4A1, CREB3L2, PIK3R3, PRKCA, ADCY1, EGFR, NFKB1, TGFBR2, VEGFA	219	128	8901	3.1753	0.66283	0.0293222	0.0230787
KEGG_PATHWAY	rno04151:PI3K-Akt signaling pathway	18	4.4226	0.00473177	ITGB5, CSF1, ITGB3, TNC, FN1, PIK3R3, PRKCA, OSMR, EGFR, NFKB1, VEGFA, HSP90B1, IGF1R, CDK6, COL4A1, CREB3L2, MET, PCK2	219	345	8901	2.12055	0.712752	0.0327488	0.0257757
KEGG_PATHWAY	rno05135:Yersinia infection	10	2.457	0.00584214	RPS6KA3, ARHGEF12, ROCK1, ROCK2, ARHGEF28, FN1, CCL2, PIK3R3, DOCK1, NFKB1	219	135	8901	3.01065	0.785831	0.039397	0.0310083
KEGG_PATHWAY	rno04066:HIF-1 signaling pathway	9	2.2113	0.00679006	CAMK2D, SERPINE1, PIK3R3, PRKCA, HIF1A, EGFR, NFKB1, IGF1R, VEGFA	219	114	8901	3.20872	0.833353	0.0446447	0.0351386
KEGG_PATHWAY	rno05211:Renal cell carcinoma	7	1.7199	0.00717066	ARNT2, TGFB2, TGFB3, PIK3R3, HIF1A, MET, VEGFA	219	70	8901	4.06438	0.849332	0.0459971	0.0362031
KEGG_PATHWAY	rno05414:Dilated cardiomyopathy	8	1.9656	0.00811082	TGFB2, ITGB5, TGFB3, TPM2, TNNC1, ITGB3, TPM1, ADCY1	219	94	8901	3.45905	0.882562	0.0507892	0.0399748
KEGG_PATHWAY	rno05218:Melanoma	7	1.7199	0.00876513	CDK6, CDH1, PIK3R3, MET, EGFR, IGF1R, GADD45G	219	73	8901	3.89735	0.901273	0.05361	0.0421949
KEGG_PATHWAY	rno05214:Glioma	7	1.7199	0.00934895	CAMK2D, CDK6, PIK3R3, PRKCA, EGFR, IGF1R, GADD45G	219	74	8901	3.84469	0.915444	0.0558812	0.0439825
KEGG_PATHWAY	rno05418:Fluid shear stress and atherosclerosis	10	2.457	0.0118084	SDC4, ITGB3, SDC2, CCL2, PIK3R3, PLAT, NFKB1, VEGFA, TNFRSF1A, HSP90B1	219	151	8901	2.69164	0.956023	0.0690135	0.0543186
KEGG_PATHWAY	rno05417:Lipid and atherosclerosis	12	2.9484	0.0136266	ABCA1, CAMK2D, XBP1, HSPA5, ROCK2, EIF2AK3, CCL2, PIK3R3, PRKCA, NFKB1, TNFRSF1A, HSP90B1	219	209	8901	2.33362	0.972906	0.0779084	0.0613195
KEGG_PATHWAY	rno04218:Cellular senescence	11	2.7027	0.0154256	TGFB2, CDK6, TGFB3, SERPINE1, CDK1, PIK3R3, RRAS2, NFKB1, HIPK2, TGFBR2, GADD45G	219	185	8901	2.41666	0.983237	0.0850301	0.0669249
KEGG_PATHWAY	rno04390:Hippo signaling pathway	10	2.457	0.0155188	WWTR1, TGFB2, TGFB3, CDH1, PARD3, SERPINE1, CTNNA1, BMP7, TEAD1, TGFBR2	219	158	8901	2.57239	0.983649	0.0850301	0.0669249
KEGG_PATHWAY	rno04610:Complement and coagulation cascades	7	1.7199	0.0186623	FGB, PLAU, SERPINE1, SERPING1, PLAT, F3, F2RL2	219	86	8901	3.30822	0.992949	0.100167	0.0788386
KEGG_PATHWAY	rno04512:ECM-receptor interaction	7	1.7199	0.0196489	SDC4, ITGB5, COL4A1, ITGB3, TNC, FN1, CD47	219	87	8901	3.27019	0.994588	0.103353	0.0813464
KEGG_PATHWAY	rno05410:Hypertrophic cardiomyopathy	7	1.7199	0.0239502	TGFB2, ITGB5, TGFB3, TPM2, TNNC1, ITGB3, TPM1	219	91	8901	3.12645	0.998297	0.123508	0.0972097
KEGG_PATHWAY	rno05222:Small cell lung cancer	7	1.7199	0.0251166	CDK6, COL4A1, CKS2, FN1, PIK3R3, NFKB1, GADD45G	219	92	8901	3.09247	0.998757	0.127032	0.0999836
KEGG_PATHWAY	rno04014:Ras signaling pathway	12	2.9484	0.0265569	CSF1, PIK3R3, PLCE1, RRAS2, PRKCA, GAB2, MET, EGFR, NFKB1, IGF1R, RASGRP3, VEGFA	219	231	8901	2.11137	0.999157	0.131782	0.103722
KEGG_PATHWAY	rno05206:MicroRNAs in cancer	14	3.4398	0.0272308	TGFB2, ROCK1, ITGB3, TPM1, TNC, PIK3R3, PRKCA, EGFR, NFKB1, VEGFA, ZEB1, CDK6, PLAU, MET	219	292	8901	1.94868	0.999298	0.131796	0.103733
KEGG_PATHWAY	rno04350:TGF-beta signaling pathway	7	1.7199	0.027562	TGFB2, ROCK1, TGFB3, BAMBI, LTBP1, BMP7, TGFBR2	219	94	8901	3.02667	0.999358	0.131796	0.103733
KEGG_PATHWAY	rno05225:Hepatocellular carcinoma	10	2.457	0.0317024	TGFB2, CDK6, TGFB3, PIK3R3, PRKCA, MET, EGFR, TGFBR2, IGF1R, GADD45G	219	179	8901	2.27061	0.999791	0.144483	0.113718
KEGG_PATHWAY	rno05226:Gastric cancer	9	2.2113	0.0320025	TGFB2, TGFB3, CDH1, CTNNA1, PIK3R3, MET, EGFR, TGFBR2, GADD45G	219	151	8901	2.42248	0.999807	0.144483	0.113718
KEGG_PATHWAY	rno04071:Sphingolipid signaling pathway	8	1.9656	0.0324479	ROCK1, ROCK2, PIK3R3, PRKCA, FYN, GAB2, NFKB1, TNFRSF1A	219	124	8901	2.62218	0.999829	0.144483	0.113718
KEGG_PATHWAY	rno04919:Thyroid hormone signaling pathway	8	1.9656	0.0324479	RCAN1, STAT1, ITGB3, RCAN2, PIK3R3, PLCE1, PRKCA, HIF1A	219	124	8901	2.62218	0.999829	0.144483	0.113718
KEGG_PATHWAY	rno05223:Non-small cell lung cancer	6	1.4742	0.0329618	CDK6, PIK3R3, PRKCA, MET, EGFR, GADD45G	219	73	8901	3.34059	0.999852	0.144483	0.113718
KEGG_PATHWAY	rno04110:Cell cycle	8	1.9656	0.0362587	TGFB2, CDK6, STAG2, TGFB3, CDK1, MCM6, CDC14A, GADD45G	219	127	8901	2.56024	0.99994	0.15498	0.12198
KEGG_PATHWAY	rno04921:Oxytocin signaling pathway	9	2.2113	0.0365352	RCAN1, CAMK2D, PPP1R12A, ROCK1, ROCK2, PRKCA, ADCY1, EGFR, MYLK	219	155	8901	2.35996	0.999944	0.15498	0.12198
KEGG_PATHWAY	rno05161:Hepatitis B	9	2.2113	0.0389563	TGFB2, MAP3K1, STAT1, TGFB3, CREB3L2, PIK3R3, PRKCA, NFKB1, TGFBR2	219	157	8901	2.3299	0.999971	0.162627	0.127999
KEGG_PATHWAY	rno04974:Protein digestion and absorption	7	1.7199	0.0404976	DPP4, COL18A1, COL15A1, SLC7A7, COL4A1, COL11A1, COL8A1	219	103	8901	2.7622	0.999981	0.16642	0.130984
KEGG_PATHWAY	rno05144:Malaria	5	1.2285	0.0452248	TGFB2, TGFB3, SDC2, CCL2, MET	219	55	8901	3.69489	0.999995	0.181627	0.142953
KEGG_PATHWAY	rno01521:EGFR tyrosine kinase inhibitor resistance	6	1.4742	0.046086	PIK3R3, PRKCA, MET, EGFR, IGF1R, VEGFA	219	80	8901	3.04829	0.999996	0.181627	0.142953
KEGG_PATHWAY	rno04068:FoxO signaling pathway	8	1.9656	0.0462699	TGFB2, TGFB3, PIK3R3, EGFR, TGFBR2, IGF1R, PCK2, GADD45G	219	134	8901	2.4265	0.999996	0.181627	0.142953
KEGG_PATHWAY	rno04310:Wnt signaling pathway	9	2.2113	0.0497087	TLE4, CAMK2D, DAAM1, ROCK2, BAMBI, PRKCA, TBL1X, GPC4, LGR4	219	165	8901	2.21694	0.999998	0.192256	0.151319
KEGG_PATHWAY	rno05213:Endometrial cancer	5	1.2285	0.0560285	CDH1, CTNNA1, PIK3R3, EGFR, GADD45G	219	59	8901	3.44439	1	0.213558	0.168085
KEGG_PATHWAY	rno05323:Rheumatoid arthritis	6	1.4742	0.0594939	TGFB2, CXCL12, CSF1, TGFB3, CCL2, VEGFA	219	86	8901	2.83562	1	0.223527	0.175932
KEGG_PATHWAY	rno04540:Gap junction	6	1.4742	0.0619235	TJP1, CDK1, PRKCA, ADCY1, EGFR, PRKG1	219	87	8901	2.80302	1	0.229379	0.180537
KEGG_PATHWAY	rno04060:Cytokine-cytokine receptor interaction	12	2.9484	0.0657388	TGFB2, CNTF, CXCL12, CSF1, TGFB3, CCL2, ACKR3, TNFRSF11B, OSMR, BMP7, TGFBR2, TNFRSF1A	219	269	8901	1.81311	1	0.240129	0.188999
KEGG_PATHWAY	rno05210:Colorectal cancer	6	1.4742	0.0669491	TGFB2, TGFB3, PIK3R3, EGFR, TGFBR2, GADD45G	219	89	8901	2.74003	1	0.2412	0.189842
KEGG_PATHWAY	rno05152:Tuberculosis	9	2.2113	0.0690466	EEA1, MRC2, TGFB2, CAMK2D, ARHGEF12, STAT1, TGFB3, NFKB1, TNFRSF1A	219	177	8901	2.06664	1	0.245395	0.193144
KEGG_PATHWAY	rno04062:Chemokine signaling pathway	9	2.2113	0.0787144	CXCL12, ROCK1, ROCK2, STAT1, PARD3, CCL2, PIK3R3, ADCY1, NFKB1	219	182	8901	2.00986	1	0.276025	0.217252
KEGG_PATHWAY	rno05166:Human T-cell leukemia virus 1 infection	11	2.7027	0.0853208	NRP1, TGFB2, MAP3K1, TGFB3, CREB3L2, PIK3R3, ADCY1, CALR, NFKB1, TGFBR2, TNFRSF1A	219	249	8901	1.79551	1	0.292052	0.229866
KEGG_PATHWAY	rno04024:cAMP signaling pathway	10	2.457	0.0855058	CAMK2D, PPP1R12A, ROCK1, ROCK2, CREB3L2, PIK3R3, PLCE1, RRAS2, ADCY1, NFKB1	219	217	8901	1.87299	1	0.292052	0.229866
KEGG_PATHWAY	rno05230:Central carbon metabolism in cancer	5	1.2285	0.0884955	SLC7A5, PIK3R3, HIF1A, MET, EGFR	219	69	8901	2.94521	1	0.298389	0.234853
KEGG_PATHWAY	rno05165:Human papillomavirus infection	14	3.4398	0.0931157	ITGB5, STAT1, ITGB3, TNC, FN1, PIK3R3, EGFR, NFKB1, VEGFA, TNFRSF1A, CDK6, COL4A1, PARD3, CREB3L2	219	353	8901	1.61194	1	0.309993	0.243987
